# Supplementary material
Source: PubMed Central journal article supplement (PMC2270319)
Supplement: pbio.0060063.sg002.pdf [file pbio.0060063.sg002.pdf]

## Figure S2

```
Gallus gallus AACCTGATTTGGTGAAAATAAGGTTTATACATACAATTATGAAAGCATACTTTTCAGTG
Homo sapiens AACCTAACTTCCA-GAAAGGGTGACTTATGATTCTAAATATGAAAGTACA-TTTCTAGTG
Canis familiaris AACTTAACTTCAG-AAAGGGACGATTTATAGTTCTAAATAAGAAAGGATA-TTTCTGATG
Dasypus novemcinctus AACCTAACTTCCAGAAAGGGAGATTTATAGTTCTAAATATGGAAGTATA-TTTCCAGTG
*** * * * * ** * **** * ** * * * * * * * * * * **

Gallus gallus GTATTCCAGAGAAAGGACTTGCAAGAACTGGAATAAGGATAAGAAGTGAAGTGGAAATTA
Homo sapiens TATTTCCACA-ACAGTACTTAGAAGACCTGGGATGTAAACAAAAAGTAAAGTAGAAGTCA
Canis familiaris GACGGCCACA-ATCATGCTTGGA AAAACTGGGATGTGGGTGAAAAGTAAAGTAGAAATCA
Dasypus novemcinctus GACTGCTACA-ACAGTACTTGGAAGAGCTGGGATATAAATGAGAAGTACAGTAGAAATCT
* * * * * **** * * * * * * * * * * * * * * * * * * * * *

Gallus gallus GTGGTATTGGACAAAACCTTTGTCTTATTAGG
Homo sapiens CTGGCACAGATCTGAAACCAAGTTTTATTAAAG
Canis familiaris CTGGCCCTGATCTAAAACCCAGTCTCATTAGG
Dasypus novemcinctus CTGGCACTGTTCTAAAATCGAGTCTTATTAGT
*** * * * * * * * * * * * * * * * *
```
