# Supplementary material
Source: PubMed Central journal article supplement (PMC2270319)
Supplement: pbio.0060063.sg003.pdf [file pbio.0060063.sg003.pdf]

**a. *VIT1***

|                       |                                                 |
|-----------------------|-------------------------------------------------|
| Gallus gallus         | ATGAGGGGTTTAATA-TCAGCCCTGGTTTTAACCTGGTG---G     |
| Monodelphis domestica |                                                 |
| Macropus eugenii      | TTGT-GATAACGTAGTAATCTCTAAATCCAACC-TAACTAATT     |
| Wallabia bicolor      | NNNNNNNNNNNNNNNNNNNNNNNNNNNNNNNNNNNNNNNNNNNNNNN |

|                              |                        |
|------------------------------|------------------------|
| <i>Gallus gallus</i>         | GGAGTCAGCATCTTAATTACC  |
| <i>Monodelphis domestica</i> | GGAGTCAACAACCTTAATTATG |
| <i>Macropus eugenii</i>      | NNNNNNNNNNNNNNNNNNNN   |
| <i>Wallabia bicolor</i>      | NNNNNNNNNNNNNNNNNNNN   |

[illegible][illegible]

|                              |                                    |
|------------------------------|------------------------------------|
| <i>Gallus gallus</i>         | TAGTGGTATTGGACCAAACTTTGTCTTATTAGG  |
| <i>Monodelphis domestica</i> | CTATGGCAAATGTCCAAATTCAGTCTTATTAGG  |
| <i>Macropus eugenii</i>      | NNNNNNNNNNNNNNNNNNNNNNNNNNNNNNNNNN |
| <i>Wallabia bicolor</i>      | NNNNNNNNNNNNNNNNNNNNNNNNNNNNNNNNNN |

[illegible][illegible]

|                              |                                                              |
|------------------------------|--------------------------------------------------------------|
| <i>Gallus gallus</i>         | TGGCCACGTTGGAAACCTTATGGCTCCTGATTCTGTCTCAGATGATGGTCTGAACATCTA |
| <i>Monodelphis domestica</i> | AGATCAGGATGGAACCATTTATGCCCTAGATTAGTTTCAGATGT---TCTGAATTTTTA  |
| <i>Macropus eugenii</i>      | NNNNNNNNNNNNNNNNNNNNNNNNNNNNNNNNNNNNNNNNNNNNNNNNNNNNNNNNNNNN |
| <i>Wallabia bicolor</i>      | NNNNNNNNNNNNNNNNNNNNNNNNNNNNNNNNNNNNNNNNNNNNNNNNNNNNNNNNNNNN |

|                              |                                                               |
|------------------------------|---------------------------------------------------------------|
| <i>Gallus gallus</i>         | CAGAGGGATTCTCAATATTCTGGAGCTCAGTCTGAAGAAGATGCAGCATTACATACAGTAT |
| <i>Monodelphis domestica</i> | TAAACATAGCCTTAACATATTGGAAATTAGTATCAA-AAGA--CAAAAACCCCTACAGTTT |
| <i>Macropus eugenii</i>      | NNNNNNNNNNNNNNNNNNNNNNNNNNNNNNNNNNNNNNNNNNNNNNNNNNNNNNNNNNNN  |
| <i>Wallabia bicolor</i>      | NNNNNNNNNNNNNNNNNNNNNNNNNNNNNNNNNNNNNNNNNNNNNNNNNNNNNNNNNNNN  |

|                              |         |
|------------------------------|---------|
| <i>Gallus gallus</i>         | ACAGGAG |
| <i>Monodelphis domestica</i> | GCCAGAG |
| <i>Macropus eugenii</i>      | NNNNNNN |
| <i>Wallabia bicolor</i>      | NNNNNNN |

Pairwise SIM alignments to chicken sequence

|                              |                                                              |
|------------------------------|--------------------------------------------------------------|
| <i>Gallus gallus</i>         | GCTGGGATTGGAGGTATTTGTAACACAACGTATGCAATTCAAGAAAACAAGAAAGCAAAC |
| <i>Monodelphis domestica</i> | TCTAGAATTGGTGATCTATTTACCACAACATATTTTATTGAAGAAGATATGAAAGCTGAT |
| <i>Macropus eugenii</i>      | NNNNNNNNNNNNNNNNNNNNNNNNNNNNNNNNNNNNNNNNNNNNNNNNNNNNNNNNNNNN |
| <i>Wallabia bicolor</i>      | NNNNNNNNNNNNNNNNNNNNNNNNNNNNNNNNNNNNNNNNNNNNNNNNNNNNNNNNNNNN |

|                              |                                                              |
|------------------------------|--------------------------------------------------------------|
| <i>Gallus gallus</i>         | CTAGTTGATGTGACCAAATCCAAGGACCTGAACAGTTGTGAAGAGAAAGTCCAAGTGGTC |
| <i>Monodelphis domestica</i> | TTTGTTTCTATAACTAGA----AGAACTTAAATAACT--GAGGAGAAGGTCAAATGAAT  |
| <i>Macropus eugenii</i>      | NNNNNNNNNNNNNNNNNNNNNNNNNNNNNNNNNNNNNNNNNNNNNNNNNNNNNNNNNNNN |
| <i>Wallabia bicolor</i>      | NNNNNNNNNNNNNNNNNNNNNNNNNNNNNNNNNNNNNNNNNNNNNNNNNNNNNNNNNNNN |

|                              |                      |
|------------------------------|----------------------|
| <i>Gallus gallus</i>         | ACAGGTTTCAGCATACACT  |
| <i>Monodelphis domestica</i> | TCTGGTTCTACTTATTCT   |
| <i>Macropus eugenii</i>      | NNNNNNNNNNNNNNNNNNNN |
| <i>Wallabia bicolor</i>      | NNNNNNNNNNNNNNNNNNNN |

Pairwise SIM alignments to chicken sequence

|                              |                                                              |
|------------------------------|--------------------------------------------------------------|
| <i>Gallus gallus</i>         | AGAAACAAGAATTCCCGGGCAACTGCTACCTATAATTACAAAATTAAATACACTCATAAT |
| <i>Monodelphis domestica</i> | CCCAACAGAAATTCCCTAGGCCACT-----TCAAGTTAAAAATAAAA---ACTTATATC  |
| <i>Macropus eugenii</i>      | NNNNNNNNNNNNNNNNNNNNNNNNNNNNNNNNNNNNNNNNNNNNNNNNNNNNNNNNNNNN |
| <i>Wallabia bicolor</i>      | NNNNNNNNNNNNNNNNNNNNNNNNNNNNNNNNNNNNNNNNNNNNNNNNNNNNNNNNNNNN |

|                              |                                                              |
|------------------------------|--------------------------------------------------------------|
| <i>Gallus gallus</i>         | GAAG---CTGTAATCACACAAGCTGAAGTCGAGGAAGTCCACCAGTTTACACCTTTCCA  |
| <i>Monodelphis domestica</i> | AAAGAGTCCTTGAGTCTTCAAGCTGAAGTTCATGAAATAGATCAATTTGTACCCTTTAA  |
| <i>Macropus eugenii</i>      | NNNNNNNNNNNNNNNNNNNNNNNNNNNNNNNNNNNNNNNNNNNNNNNNNNNNNNNNNNNN |
| <i>Wallabia bicolor</i>      | NNNNNNNNNNNNNNNNNNNNNNNNNNNNNNNNNNNNNNNNNNNNNNNNNNNNNNNNNNNN |

|                              |           |
|------------------------------|-----------|
| <i>Gallus gallus</i>         | TGAGATAAC |
| <i>Monodelphis domestica</i> | TAAGCTGAC |
| <i>Macropus eugenii</i>      | NNNNNNNNN |
| <i>Wallabia bicolor</i>      | NNNNNNNNN |

Pairwise SIM alignments to chicken sequence

|                              |                                                              |
|------------------------------|--------------------------------------------------------------|
| <i>Gallus gallus</i>         | GCGCTACCTTTT-GGATTTACTTCCTGCA-GCAGCCAGTCACCGTTCCTGA--GATTCT  |
| <i>Monodelphis domestica</i> | GTGCTTATTTT-AGATATACTCTCTGCCTGTGGCCTGT-ATAGAAGACTTGTTGGTTCT  |
| <i>Macropus eugenii</i>      | GTGCATATTTT-TAGATATTCTCCCTGCC-ATGGCCAGT-ATAGAAGACTAGGTGGTTCT |
| <i>Wallabia bicolor</i>      | NNNNNNNNNNNNNNNNNNNNNNNNNNNNNNNNNNNNNNNNNNNNNNNNNNNNNNNNNNNN |

|                              |                                                              |
|------------------------------|--------------------------------------------------------------|
| <i>Gallus gallus</i>         | TGAGGCATAAAATGGAAAGGCAAGAGCTCACCAACTGGGAAATAGCTCAGACAGTGCTTG |
| <i>Monodelphis domestica</i> | CAGGGTATAAAATTGAAAAGGAAGAAATTAGAGAATGGGAGGCAGCTCAGGCTATACTCC |
| <i>Macropus eugenii</i>      | CAAGGTATAAAATTGAAAAGGCAGAAATTAGAGAATGGGAGGCAGTTCAGGCTCAACTCT |
| <i>Wallabia bicolor</i>      | NNNNNNNNNNNNNNNNNNNNNNNNNNNNNNNNNNNNNNNNNNNNNNNNNNNNNNNNNN   |

|                              |    |
|------------------------------|----|
| <i>Gallus gallus</i>         | TG |
| <i>Monodelphis domestica</i> | TG |
| <i>Macropus eugenii</i>      | TG |
| <i>Wallabia bicolor</i>      | NN |

Pairwise SIM alignments to chicken sequence

|                              |                                                              |
|------------------------------|--------------------------------------------------------------|
| <i>Gallus gallus</i>         | CTTTGAAAGCCCTTGGAATGTAGGACATCCAGCCAGCATCAAGCACATCAAGAAA-TTT  |
| <i>Monodelphis domestica</i> | CTTTGAAATCCATAGGGAATAAAGGACATGGGGCCAGTCTGAATTAGAACAGAAAAGTTC |
| <i>Macropus eugenii</i>      | CTTTGAAAGCCATGGGGGATGAAGAACATGTAGCCAGTCTGAATCAGAACAGCAA-GTTC |
| <i>Wallabia bicolor</i>      | CTTTGAAAGCCATGGGGGATGAAGAACATGTAGCCAGTCTGAATCAGAACAGCAA-GTTC |
|                              | ***** * * * * * * * * * * * * * * * * * * * * * * *          |

|                              |                                                             |
|------------------------------|-------------------------------------------------------------|
| <i>Gallus gallus</i>         | TTGCCCGGCTATGCAGCTGGTGCCTCAGAACTGCCCTCAAGGTCCATGAAACTGCTGTG |
| <i>Monodelphis domestica</i> | CTGCCTGG-----GCTTCTGGGCTTCCCATCAGAATTCTGATTGTTGCTGTC        |
| <i>Macropus eugenii</i>      | CTACCTGGATATTTACTGG--GCTTCTGGCTTCCCAACAGAATTCTAATTGTCTGTT   |
| <i>Wallabia bicolor</i>      | CTACCTGGATATTTACTGG--GTTTCTGGCTTCCCAACAGAATTCTAATTGTCTGTT   |
|                              | * * * * * * * * * * * * * * * * * * * * * * * *             |

|                              |                                           |
|------------------------------|-------------------------------------------|
| <i>Gallus gallus</i>         | ATGGCTCTAAAAAGCATAGGCATGAGAGATCCCAAATG    |
| <i>Monodelphis domestica</i> | ACATCCATGAGAAACAGAGCCAAGAGAAATCCAAACAG    |
| <i>Macropus eugenii</i>      | ACATCCATAAGAAACATAGTCAAGAGAAACTTCAAACAG   |
| <i>Wallabia bicolor</i>      | ACATCCATGAGAAACATAGTCAAGAGAAACTTCAAACAG   |
|                              | * * * * * * * * * * * * * * * * * * * * * |

Pairwise SIM alignments to chicken sequence

|                              |                                                              |
|------------------------------|--------------------------------------------------------------|
| <i>Gallus gallus</i>         | GTCCAGGCTATTACCCTTGAGATTTTCCTGAATCACAAAATTCATCCTCGAATCCGAATG |
| <i>Monodelphis domestica</i> | GTTCAAGAAATAGTTCTTCATATATTCTTTAATACCAACATCCCTCCCCAAGACAGAATT |
| <i>Macropus eugenii</i>      | GTTCAAGAAATAGCTCTTCATGTGTTCTCAATACTGATGTCCCTCCCCAAGATGAAATA  |
| <i>Wallabia bicolor</i>      | GTTCAAGAAATAGCTCGTCATGTGTTCTCANTACTGATGTCCCTCCCCAGGATGAAATA  |
|                              | ** * * * * * * * * * * * * * * * * * * * * *                 |

|                              |                                                          |
|------------------------------|----------------------------------------------------------|
| <i>Gallus gallus</i>         | TTAGCTGCAGTGTTTGTCTTGAAACTAAGCCAG-----GTCT-----TCCAAT    |
| <i>Monodelphis domestica</i> | GTTCTTTGTCTGGTTCTATTGGAACTATACCTG-----AGCT-----AATAAT    |
| <i>Macropus eugenii</i>      | GTTCTTTCTCCAGCTTTATTGGAACTGTTGGAGGGAGGACAAGAA-----AACAAA |
| <i>Wallabia bicolor</i>      | GTTCTTTCTCCAGCTTTATTGGAACTGTTGGAG-----GGAGGACAAAAAACAAA  |
|                              | * * * * * * * * * * * * * * * * * * * * *                |



[illegible]

Pairwise SIM alignments to chicken sequence

[illegible]

Pairwise SIM alignments to chicken sequence

*Gallus gallus* TGCATTATGTACAGTCTGCAGTGCTTAATAAATATGTTGTTTCATTAAATAAGTA  
*Monodelphis domestica* T-CATTATGTACAGTTTG---TTTTTAATAAATGTGTTGCTCATTAAATACGCA  
*Macropus eugenii* TGCATTATGTACAGTTTG---TTTCTAATAAATGTGTTGCTCATTAAATACCCA  
*Wallabia bicolor* TGCATTATGTACAGTTTG---TTTCTAATAAATGTGTTGCTCATTAAATACGCA  
 \* \*\*\*\*\* \*\* \* \*\*\*\*\*

## b. VIT2

Pairwise SIM alignments to chicken sequence

```
Gallus gallus          GTCCGCTCTCCACAAGTGGAGGAGTACAATGGGGTCTGGCCAGGGATCCCTTCACTCGA
Monodelphis domestica CTTCAGGCTCCATAACTAGAAGAATGCACCAGTTTCTGGAGTAAAGATTCCTTCATTTAC
Macropus eugenii      ATTCAGTCTCCACAAGTAGAAGAATACACTGGTATCTGGCCTAAAGATTCATTCATCTAT
Wallabia bicolor      CTGTAGTCTCCAGTAGAAGAAGACTACAGTGGTAT---GCGTCAAGATTCATTCATCTAT
                        *      * * * * * * * * * *      * *      *      * * * * *
```

```
Gallus gallus          TCTTCCAAAATCACCCAAGTGATCT-CATCGTGTTCACCCGGCTCTTC---AAATTTGA
Monodelphis domestica TCACCTAAGCCCACTAAGGCAAT-T-CATCTGGCCTTATCCAAATAT-----AAGCTTGA
Macropus eugenii      TCACCTAAGCTCACTCAGACAAT-TGCATCTGGCTTTATGCAAATATTC---AAGTTTGA
Wallabia bicolor      TCATCTCAGATCATTAATCCAAC-AGCATCATGCGGTTTTCAAATAATCAAGAAGTTGGA
                        ** * * * * * *      *      *      *      *      *      *      *
```

```
Gallus gallus          ATACAGCAGTGGACGGATCGGAAACATTTATGCCCCAGAAGACTGCCCAGATCTGTGTGT
Monodelphis domestica GAATAATAATGGGCACATTGGCAACTTCTATGCCCCAAAAGTCACCTCAACTATCATTTGT
Macropus eugenii      GTATAATAACGGACTAATCGGCAACATCTATGCCCCAAAGGACACCCAGCTATCTCTGT
Wallabia bicolor      CTTCAATAGTGTA---ATAGTCAACAACATTGCTGCAACAAACGCCCCACCAATTTTTTTT
                        * * *      * * *      * * *      * * *      * * *      * * *
```

```
Gallus gallus          TAACATAGTGAGAGGAATATTGAACATGTTCCAGATGACCATTAAAAAATCACAGAACG-
Monodelphis domestica TAACATAATAAGTGAATACTAAATATGTTCCATTTTACCATCAAAAAGTCTCAAGATAG
Macropus eugenii      TAACATAGTAAGAGGGATACTAAATATGTTCCATATCACCATCAAGAAGTCTCAAAATAT
Wallabia bicolor      TGTCAATCGTAGGAAGGATGATAAATATGTTGCTTATCATCACCAAGAAGTAGTATAA--A
                        * * * * * * * * * * * * * * * * * * * * * * *
```

```
Gallus gallus          -TCTACGAATTACAAGAG
Monodelphis domestica ATCTATTACTTGCAAGAG
Macropus eugenii      AT--ATTACTTACAAGAG
Wallabia bicolor      ATTTATTATTAACAACAG
                        * * * * * * * *
```

Pairwise SIM alignments to chicken sequence

```
Gallus gallus          GCTGGAATTGGAGGTATTTGTCATGCAAGGTATGTCATTCAGGAAGACAGGAAGAATAGC
Monodelphis domestica GCCAGGATTGGTAGTGTATGTTATACCAATTATATCATCCATGAAGATAAGATAAATAAT
Macropus eugenii      NNNNNNNNNNNNNNNNNNNNNNNNNNNNNNNNNNNNNNNNNNNNNNNNNNNNNNNNNNNNN
Wallabia bicolor      NNNNNNNNNNNNNNNNNNNNNNNNNNNNNNNNNNNNNNNNNNNNNNNNNNNNNNNNNNNNN
```

```
Gallus gallus          CGAATCTATGTTACCAGAACTGTGGACTTGAATAATTGCCAGGAAAAGGTGCAAAAAAGC
Monodelphis domestica AAGGTTTCTATCATGAAATCCAGAGATCT---CAACTGCCAGGACAAGGCAGTCAGAAAG
Macropus eugenii      NNNNNNNNNNNNNNNNNNNNNNNNNNNNNNNNNNNNNNNNNNNNNNNNNNNNNNNNNNNNN
Wallabia bicolor      NNNNNNNNNNNNNNNNNNNNNNNNNNNNNNNNNNNNNNNNNNNNNNNNNNNNNNNNNNNNN
```

```
Gallus gallus          ATTGGAATGGCTTACATCTATCCCTGCCC
Monodelphis domestica ATAGGAATGGCTTATCTACATGTCTTTCC
Macropus eugenii      NNNNNNNNNNNNNNNNNNNNNNNNNNNNNNN
Wallabia bicolor      NNNNNNNNNNNNNNNNNNNNNNNNNNNNNNN
```

|                              |                                                                |
|------------------------------|----------------------------------------------------------------|
| <i>Gallus gallus</i>         | AAAGAAAGGCTCACCAAGGGACCACCGCTTTCTCCTACAAGCTGAAGCAGTCAGACAGC    |
| <i>Monodelphis domestica</i> | AAAAGTGAGATTGTGAAAGGAACAGAGACATAGTCTACAAAATGAAGTATATAAA-AGG    |
| <i>Macropus eugenii</i>      | AAAGCTGGGATTGTTAAAGAAACAGAGACATACTCCTACAAAATGAAGTATACAGG-ACA   |
| <i>Wallabia bicolor</i>      | NNNNNNNNNNNNNNNNNNNNNNNNNNNNNNNNNNNNNNNNNNNNNNNNNNNNNATGAA-ATT |

\*

*Gallus gallus* -GGCACGCTGATCACAGATGTCTCGTCGCGGCAGGTGTATCAGATCTCCCCATTCAATGA  
*Monodelphis domestica* -GGGGCTCTCATCACAGAAATTATGTTTACCAGGTATTAACAAGTCCCCCTATTCAATAA  
*Macropus eugenii* TGGGGCTTTGATCACAGAAGTTACAGTTCACCAGATATACCAAGTCTCCCCATTCAATGA  
*Wallabia bicolor* -GGTAATTGATCAC -GAGCTTACAGTACACCATATATACTTTTGTCCGCATTAATGT  
 \*\* \* \* \* \* \*

*Gallus gallus* GCCCACTGGGGTGGCTGTCATGGAAGC---AAG  
*Monodelphis domestica* AGAGAATGGGGTTGATGTGACAGATAC---TAT  
*Macropus eugenii* AGAGAACGGGGTTGGAGTGACAGAAAC---TAA  
*Wallabia bicolor* GCCGACTGGAGTTGGATGGACAGAAAAAGCAA  
\*   \*   \*   \* \*   \*   \* \*

|                              |                                                              |
|------------------------------|--------------------------------------------------------------|
| <i>Gallus gallus</i>         | ACAGCAGCTCACTTTGGTCGAGGTGAGAAG-TGAGCGGGGCAGTGCCCCGATGTCCCCA  |
| <i>Monodelphis domestica</i> | ACAAAACATCAGCTTGTATGAAGTGAAAAATAAATATTGAGCTCCCTAAAGTTCAA     |
| <i>Macropus eugenii</i>      | GCAAAACTCTCAGCTTGATCGAAGTGAAAAACGAGA-GTTTGAGCTCCCAGAAGTTCTAT |
| <i>Wallabia bicolor</i>      | GCAAGACCCTCAGCTTGATCGAAGT-AAAAAACGAGAGTTTGAGCTCCCAGAAGTTCTAT |
|                              | ** *    *** ** *    * * * * *                                |

|                              |                                          |                           |
|------------------------------|------------------------------------------|---------------------------|
| <i>Gallus gallus</i>         | TGCAGAACTATGGCAGCCTTCGCTACCGCTTCCAGCCGTA | CTACTGCCACAGATGCCACTTC    |
| <i>Monodelphis domestica</i> | TGCAGAACTCAGATAAGTCTTCAGTACCTTTTCCAACCA  | CCAGACATCAGATGCCTTTTC     |
| <i>Macropus eugenii</i>      | TGCAGAACTCAGGGAAACCTTCAGTACCGTTTTCTTA    | ACCACCAGACACCAGATGCCTTTCC |
| <i>Wallabia bicolor</i>      | TGCAGAACTCAGGGAAACCTTCAGTACCATTTCTTA     | ACCACCAGACACCAGATGCCTTTCC |
|                              | *****                                    | * * * * *                 |

|                              |                                                             |
|------------------------------|-------------------------------------------------------------|
| <i>Gallus gallus</i>         | AGCTGATCAAGACAAAA-----AACCTGAGCAA                           |
| <i>Monodelphis domestica</i> | AGTTGGTAAAAATAAAT-----TCATTTCATCAG                          |
| <i>Macropus eugenii</i>      | AGCTAGTGAAATGAATAACCCCAAAAGGCAGGTATGAAACAGGCTTTTCACTTAATCAG |
| <i>Wallabia bicolor</i>      | AGCTAGTGAAATGAATGACCCCAAAAGGCAGGTATGAAATGGGCTTTTCACTTAATCAG |
|                              | * * * * *                                                   |

*Gallus gallus* -----CGG  
*Monodelphis domestica* -----CAG  
*Macropus eugenii* GTTCTTTGAGGGCTAG  
*Wallabia bicolor* GTTCTTTGAGGGCTAG

\*

*Gallus gallus* ATAATAGAAACGCTGCAGCACATAGTCTGAATAACCAACAAGATTTCATGACGATGTT  
*Monodelphis domestica* -----GAGGTACTCCAGCACCTCCTTCAGAACCACCAAGGAACATTCCATGAAGATGCT  
*Macropus eugenii* -----GAGGTCCTCCAGCACCTCATCCAGAATAACCAAGAAACATTCCATGAAGATGCT  
*Wallabia bicolor* -----GAGGTCCTCCAGCACCTCATCCAGAATAACCGAGAAACATTCCATGAAGATGCT  
\*\*\* \*\* \* \* \* \* \*

|                              |                                                               |
|------------------------------|---------------------------------------------------------------|
| <i>Gallus gallus</i>         | TCATACAGATTCTTAGAGGTGGTCCAGCTTTGCCGGATAGCAAATGCTGACAATCTTGAG  |
| <i>Monodelphis domestica</i> | CCAGCCAGATTTCTCAAACCTCATCCAGCTCATCAAATGATGGATGCTAGAAGTCTGGTC  |
| <i>Macropus eugenii</i>      | CCCACCAAACCTTCTAGAGCTTATCCAGCTGATTCAGTCAATGGATGTCGGAAGCCTGGCC |
| <i>Wallabia bicolor</i>      | CCCACCAAACCTTCTAGAGCTTATCCAGCTGATTCGGTCAATGGATGTCGGAAGCCTGGCC |
|                              | *   * * *   *   *   *   *   *   *   *   *   *   *   *   *     |

|                              |                                           |
|------------------------------|-------------------------------------------|
| <i>Gallus gallus</i>         | TCTATCTGGAGACAAGTTTCAGATAAACCTCGTTACAG    |
| <i>Monodelphis domestica</i> | AATGTTTGAAAGCAGTGGAAGACAAGCCTCAATATTG     |
| <i>Macropus eugenii</i>      | AGCGTTTGGAAGCAGTGGAAGACAGGACTCAGCACAG     |
| <i>Wallabia bicolor</i>      | AGCGTTTGGAAGCAGTGGAAGACAGGACTCAGCACAG     |
|                              | *   * * *   *   *   *   *   *   *   *   * |

Pairwise SIM alignments to chicken sequence

|                              |                                                               |
|------------------------------|---------------------------------------------------------------|
| <i>Gallus gallus</i>         | TGGCTCCTGAGCGCAGTTTCTGCGAGTGGCACCACAGAAACACTAAAATTCCCTTAAGAAC |
| <i>Monodelphis domestica</i> | TGATTGCTGAGTGTCTCTCTATGGCTGGAACCAAAGATATCTTGAAGTTCACCAAGCAA   |
| <i>Macropus eugenii</i>      | TGGTTGCTGACTGCCATCACCATGGCAGGAACCAAAGACACCCTGAAACTCATCAAGCAA  |
| <i>Wallabia bicolor</i>      | NNNNNNNNNNNNNNNNNNNNNNNNNNNNNNNNNNNNNNNNNNNNNNNNNNNNNNNNNNNN  |

|                              |                                                              |
|------------------------------|--------------------------------------------------------------|
| <i>Gallus gallus</i>         | AGAATTGCAATGATGACCTCAACTACATTGACACCCTTCTAACTGTTTCTTTGACTCTT  |
| <i>Monodelphis domestica</i> | AAAATTGGGAGTGAATTCTTCTCCTTCTTAAAGAATTTGCTAG-TGGTTGTTTTTTTCAT |
| <i>Macropus eugenii</i>      | GAAATTGAGAGTGATGCCTTCTCCTTCTTGAAAATTTGTGG-TGGTTGTTTGTCTCT    |
| <i>Wallabia bicolor</i>      | NNNNNNNNNNNNNNNNNNNNNNNNNNNNNNNNNNNNNNNNNNNNNNNNNNNNNNNNNNNN |

|                              |                                                              |
|------------------------------|--------------------------------------------------------------|
| <i>Gallus gallus</i>         | CATTTATTGCAA--GCTGATGAACACACACTTCCAATAGCAGCA                 |
| <i>Monodelphis domestica</i> | TAAATCTTACTATAGCTGATGCCAATGTCCTTCCCATAGCTGCT                 |
| <i>Macropus eugenii</i>      | CCAA-CTCACTACAGCCGACACCAGTGTCTTCCCATAGCTGCA                  |
| <i>Wallabia bicolor</i>      | NNNNNNNNNNNNNNNNNNNNNNNNNNNNNNNNNNNNNNNNNNNNNNNNNNNNNNNNNNNN |

Pairwise SIM alignments to chicken sequence

|                              |                                                                   |
|------------------------------|-------------------------------------------------------------------|
| <i>Gallus gallus</i>         | GATTTAATGACCAGCTCTCGAATTCAGAAAAATCCTGTGCTTCAGCAAGTGGCCTGCTTG      |
| <i>Monodelphis domestica</i> | AAAATTGTCGCCAGTCCCTCAAATACAGAAATATTTCTTGCTTCAAAAAGTGGCTCTCCTA     |
| <i>Macropus eugenii</i>      | GAAATTGTCACCAGTCCCTCAAATACAGAAATATCCCTTGCTTCAAAAGGTTGCTCTCCTG     |
| <i>Wallabia bicolor</i>      | GAAATTGTCACCAGTCCCTCAAATATAGAAATATCCCTTGCTTCAAAAGGTTGCTCTCCTG     |
|                              | *   *   *   *   *   *   *   *   *   *   *   *   *   *   *   *   * |

|                              |                                                               |
|------------------------------|---------------------------------------------------------------|
| <i>Gallus gallus</i>         | GGATATAGCTCTGTAGTCAACAGATACTGCTCTCAGACCTCAGCATGTCTTAAGGAAGCT  |
| <i>Monodelphis domestica</i> | GCTTATGGCTCTACGGTTTATAGGATGTATCTGCCACTTCATCATCTCTTGCTGAAACC   |
| <i>Macropus eugenii</i>      | GCCTACGGCTCTATGGTTTACAGGTCATATCTTTTCACTTCAGCATCTCCTGCTGAAGCC  |
| <i>Wallabia bicolor</i>      | GCCTACGGCTCTATGGTTTACAGGTCATATCTTTTCACTTCAGCATCTGCTGCTGAAGCC  |
|                              | *   *   *   *   *   *   *   *   *   *   *   *   *   *   *   * |

|                              |           |
|------------------------------|-----------|
| <i>Gallus gallus</i>         | CTTCAG    |
| <i>Monodelphis domestica</i> | CGTTAG    |
| <i>Macropus eugenii</i>      | CTTCAG    |
| <i>Wallabia bicolor</i>      | CTTCAG    |
|                              | *   *   * |

Pairwise SIM alignments to chicken sequence

|                              |                                                              |
|------------------------------|--------------------------------------------------------------|
| <i>Gallus gallus</i>         | TCCATGACCTGGCAGATGAAGCAATCAGCAGGGGCCGTGAAGACAAAATGAAATTAGCTC |
| <i>Monodelphis domestica</i> | TCCATAATTACACAAATGAAGCAATTAATAATGGCCAGCAAGAAGCAATGGTCATAGCAA |
| <i>Macropus eugenii</i>      | NNNNNNNNNNNNNNNNNNNNNNNNNNNNNNNNNNNNNNNNNNNNNNNNNNNNNNNNNNNN |
| <i>Wallabia bicolor</i>      | NNNNNNNNNNNNNNNNNNNNNNNNNNNNNNNNNNNNNNNNNNNNNNNNNNNNNNNNNNNN |

|                              |                                                              |
|------------------------------|--------------------------------------------------------------|
| <i>Gallus gallus</i>         | TAAAGTGCATTGGTAACATGGGAGAACCAGCCAGCTTAAAGCGCATCCTGAAGTTCCTTC |
| <i>Monodelphis domestica</i> | TGAAGGTCCTTGGCAACTCGGGCTAAGTGGCCAGCATCAAATGCATCCAGAAGCACCTGC |
| <i>Macropus eugenii</i>      | NNNNNNNNNNNNNNNNNNNNNNNNNNNNNNNNNNNNNNNNNNNNNNNNNNNNNNNNCTGC |
| <i>Wallabia bicolor</i>      | NNNNNNNNNNNNNNNNNNNNNNNNNNNNNNNNNNNNNNNNNNNNNNNNNNNNNNNNNNNN |

|                              |                                                                     |
|------------------------------|---------------------------------------------------------------------|
| <i>Gallus gallus</i>         | CAATATCTTCATCCAGTGCTGCTGATATCCCAGTCCACATTAGATAGATGCCATAACGG         |
| <i>Monodelphis domestica</i> | CAAGATTCTCCCCATCTGCTTCTGCTCTTCCAGGCAGGGTTCATGTGGA-----AG            |
| <i>Macropus eugenii</i>      | CA-GATTCTCACTATCTGCTTCTGATCTTCCAGTCAGGGTTCAGTGA-----AG              |
| <i>Wallabia bicolor</i>      | NNNNNNNNNNNNNNNNNNNNNNNNNNNNNNNNNNNNNNNNNNNNNNNNNNNNNNNNNNNN-----NN |

|                              |                                                              |
|------------------------------|--------------------------------------------------------------|
| <i>Gallus gallus</i>         | CCTTGA-----AAAAGATAGCTTGAAGGACCCCAAAACA                      |
| <i>Monodelphis domestica</i> | CTGTGA-----GAAAGAGAGTCAGGAAAGAGCCTTCAAAA                     |
| <i>Macropus eugenii</i>      | CAGTGATGGCCCTGAGGAAGATAGTCAGGGAAGATGCCTCAAAG                 |
| <i>Wallabia bicolor</i>      | NNNNNNNNNNNNNNNNNNNNNNNNNNNNNNNNNNNNNNNNNNNNNNNNNNNNNNNNNNNN |

Pairwise SIM alignments to chicken sequence

|                              |                                                               |
|------------------------------|---------------------------------------------------------------|
| <i>Gallus gallus</i>         | GTGCAGGGCTATCTCATCCAGATCCTTGCAGACCAATCACTTCCCCCTGAGGTGCGAATG  |
| <i>Monodelphis domestica</i> | TCAATAAACTCCAGTGGCTCCTAATTGCCCCCTGGGATAAAAGGACAGCATCTCTGTTTGA |
| <i>Macropus eugenii</i>      | -----                                                         |
| <i>Wallabia bicolor</i>      | -----                                                         |

|                              |                                                              |
|------------------------------|--------------------------------------------------------------|
| <i>Gallus gallus</i>         | ATGGCTTGTGCTGTTATCTTTGAGACAAGGCCTGCCCTTGCTTTGATAACGACTATAGCT |
| <i>Monodelphis domestica</i> | CATTTTTCTGCTTTTCTGTTTGAAGTACAGCCTCCTCCTTCTGTGATGACCACAGCAGCC |
| <i>Macropus eugenii</i>      | -----TGCTTTGCTGTTTGAAGCTCAGCCTTCTCCTTCTGTGATGACCATGGTGGCC    |
| <i>Wallabia bicolor</i>      | -----TCTGCTTTGCTGTTTGAAGCTCAGCCTTCTCCTTCTGTGATGACCATGGTGGCC  |
|                              | ***** * * ***** ***** * * * * * * * * * * *                  |

|                              |                                                              |
|------------------------------|--------------------------------------------------------------|
| <i>Gallus gallus</i>         | AACGTGGCAATGAAGGAGAGCAATATGCAAGTGGCCAGTTTTGTATATTCCCACATGAAG |
| <i>Monodelphis domestica</i> | GATATCATGCTAAAGGAGAAGAGCTTGCAAGTAGCCAACTTCATTTACTCCAACGTGAAG |
| <i>Macropus eugenii</i>      | AATATCATGCTGAAGGAGAAAGACTTGCAAGTAGCCAGCTTCATTTACTCCTACATGAAG |
| <i>Wallabia bicolor</i>      | AATATCATGCTGAAGGAGAAAGACTTGCAAGTAGCCAGCTTCATTTACTCCTACATGAAG |
|                              | * * * * * ***** ***** * * * * * * * * * * *                  |

|                              |                                        |
|------------------------------|----------------------------------------|
| <i>Gallus gallus</i>         | TCTTTGTCAAAGAGCAGATTGCCATTTATGTACAACAT |
| <i>Monodelphis domestica</i> | ACCATCTCCACAAATCACTTTCCAGACGGGGCTAATGT |
| <i>Macropus eugenii</i>      | ACCATCTCCACAAATCACTTTCCAGATTGGGGTAACAT |
| <i>Wallabia bicolor</i>      | ACCATCTCCACAAATCACTTTCCAGATTGGGGTAACAT |
|                              | * * * * * * * * * * * * * * *          |

Pairwise SIM alignments to chicken sequence

|                              |                                                               |
|------------------------------|---------------------------------------------------------------|
| <i>Gallus gallus</i>         | ATCTTCAGCTTGTAACATTGCCCTTAAGCTCCTGTCCCCAAACTGGACAGTATGAGCTA   |
| <i>Monodelphis domestica</i> | GTCTGCAGGAAGCAACATTGCCATCAAATTCTTGAGTCCCAAACATGGAACACCTGACTTA |
| <i>Macropus eugenii</i>      | NNNNNNNNNNNNNNNNNNNNNNNNNNNNNNNNNNNNNNNNNNNNNNNNNNNNNNNNNNNN  |
| <i>Wallabia bicolor</i>      | NNNNNNNNNNNNNNNNNNNNNNNNNNNNNNNNNNNNNNNNNNNNNNNNNNNNNNNNNNNN  |

|                              |                                                              |
|------------------------------|--------------------------------------------------------------|
| <i>Gallus gallus</i>         | TCGGTA-----CAGCAAGGTCATTGAGCA-GACACTTACTTTG                  |
| <i>Monodelphis domestica</i> | CCACTATTTATTTCTCTTGCTACTTCAGCAAGTAAAATGGATCATGTGGGGTGTTC     |
| <i>Macropus eugenii</i>      | NNNNNNNNNNNNNNNNNNNNNNNNNNNNNNNNNNNNNNNNNNNNNNNNNNNNNNNNNNNN |
| <i>Wallabia bicolor</i>      | NNNNNNNNNNNNNNNNNNNNNNNNNNNNNNNNNNNNNNNNNNNNNNNNNNNNNNNNNNNN |

Pairwise SIM alignments to chicken sequence

|                              |                                                              |
|------------------------------|--------------------------------------------------------------|
| <i>Gallus gallus</i>         | ATAACTATAGAGTTGGTGCTACTGGAGAAATCTTGTGTGAACAGCCCAAGAACTATGT   |
| <i>Monodelphis domestica</i> | GAGAGTAAAAGCCTGGCACGTTTCATGAGATTCTTCATCTTATACAGTGTGAGACTTTGT |
| <i>Macropus eugenii</i>      | NNNNNNNNNNNNNNNNNNNNNNNNNNNNNNNNNNNNNNNNNNNNNNNNNNNNNNNNNNNN |
| <i>Wallabia bicolor</i>      | NNNNNNNNNNNNNNNNNNNNNNNNNNNNNNNNNNNNNNNNNNNNNNNNNNNNNNNNNNNN |

|                              |                                                               |
|------------------------------|---------------------------------------------------------------|
| <i>Gallus gallus</i>         | TCCCATCAGCAATAATTTCCAAATTGATGGCAAATTCTGCAGGTTCACTGGCTGATCTGG  |
| <i>Monodelphis domestica</i> | TCCCAACAGCCAAAACCTTCGAGCCTGGGGGCACACTTTGCTGGGGCATCCATCAGTCTTG |
| <i>Macropus eugenii</i>      | NNNNNNNNNNNNNNNNNNNNNNNNNNNNNNNNNNNNNNNNNNNNNNNNNNNNNNNNNNNN  |
| <i>Wallabia bicolor</i>      | NNNNNNNNNNNNNNNNNNNNNNNNNNNNNNNNNNNNNNNNNNNNNNNNNNNNNNNNNNNN  |

|                              |       |
|------------------------------|-------|
| <i>Gallus gallus</i>         | TAGAG |
| <i>Monodelphis domestica</i> | TGGAG |
| <i>Macropus eugenii</i>      | NNNNN |
| <i>Wallabia bicolor</i>      | NNNNN |

Pairwise SIM alignments to chicken sequence

|                              |                                                              |
|------------------------------|--------------------------------------------------------------|
| <i>Gallus gallus</i>         | GTTGGCATCCGAGTGAAGGCCCTCGCAGATGTCATAATGAAAAGAAACATCCCATTGCT  |
| <i>Monodelphis domestica</i> | GCTGCTATCTAGGTGAAGGTTTGACAGAACTATGAGGAGAAAGAATACATAATTTGTG   |
| <i>Macropus eugenii</i>      | NNNNNNNNNNNNNNNNNNNNNNNNNNNNNNNNNNNNNNNNNNNNNNNNNNNNNNNNNNNN |
| <i>Wallabia bicolor</i>      | NNNNNNNNNNNNNNNNNNNNNNNNNNNNNNNNNNNNNNNNNNNNNNNNNNNNNNNNNNNN |

|                              |                                                              |
|------------------------------|--------------------------------------------------------------|
| <i>Gallus gallus</i>         | GAATATCCCACATACAAGCAGATAAAGGAGCTTGAAAAGCT                    |
| <i>Monodelphis domestica</i> | GAATCTCCCTCACATAAGAAGATAAAGGAACCTGTAAAGGCA                   |
| <i>Macropus eugenii</i>      | NNNNNNNNNNNNNNNNNNNNNNNNNNNNNNNNNNNNNNNNNNNNNNNNNNNNNNNNNNNN |
| <i>Wallabia bicolor</i>      | NNNNNNNNNNNNNNNNNNNNNNNNNNNNNNNNNNNNNNNNNNNNNNNNNNNNNNNNNNNN |

Pairwise SIM alignments to chicken sequence

|                              |                          |
|------------------------------|--------------------------|
| <i>Gallus gallus</i>         | CTGCAGGGATGGAAGAGCTGCC   |
| <i>Monodelphis domestica</i> | CTGCAGGGACAGAGGGAGCTACC  |
| <i>Macropus eugenii</i>      | NNNNNNNNNNNNNNNNNNNNNNNN |
| <i>Wallabia bicolor</i>      | NNNNNNNNNNNNNNNNNNNNNNNN |

Pairwise SIM alignments to chicken sequence

```
Gallus gallus          TACAGTTGCAACGATGGGTGTCAACACAGAATACTTTCAACATGCTGTTGAAATT-----
Monodelphis domestica TACACTGGCAGCAATGGCCATCAACACTGCTGTCTTTTCAG-----ATTGACATT-----
Macropus eugenii      CTCTGTGGCAGTAATGACCATCAACACCCCTGTCTTCCAG-----TCTGGCATTGAGCT
Wallabia bicolor      CTCTGTGGCAGCAATGACCATCAACACCCCTGTCTTCCAG-----TCTGGCATYgagct
                        *  *  ***      ***      *  *  *  *  *  *  *  *  *  *  *  *
```

```
Gallus gallus          -----CAAGGCGAGGTCCAGACAAGAATGCCAATGAAGTTTGATGCCAAGAT
Monodelphis domestica -----CAAG-----CAGATCAC----TCAATGGAATTGGTCACCAAGTT
Macropus eugenii      CCAGGCAAAACTCCAGG-----CAACTTAC---CCAATGAAATTGGACATGAAATT
Wallabia bicolor      ccaggcgaaactcCAGG-----CAACTTAC---CCAATGAAATTGGACATGAAATT
                        *  *  *  *  *  *  *  *  *  *  *  *  *  *  *
```

```
Gallus gallus          AGATGTGAAATTGAAAAACCTTAAGATTGAAACGAACCCATGCCGTGAGGAAACTGAGAT
Monodelphis domestica AGACCGAGAAGAGAAAAGCTTTAAGTATGAAATCTTCCATTAGACCAAAAGACTAAGCT
Macropus eugenii      GGACCTAAAAGAGAAACACTTTAAGTATGAAACCTTTCCATGGCCCCCAGAGTCGGAGCT
Wallabia bicolor      GGACCTAAAAGAGAAACACTTTAAGTATGAAACCTTTCCATGGCCCCCAGAGTCGGAGCT
                        **      **      ***      *  *  *  *  *  *  *  *  *  *  *  *
```

```
Gallus gallus          AGTGGT
Monodelphis domestica CCTGAT
Macropus eugenii      CCTGAT
Wallabia bicolor      CCTGAT
                        *  *  *
```

Pairwise SIM alignments to chicken sequence

```
Gallus gallus          ACATAAGGCTTTTGCTGTATCAAGGAACATAGGAGAACTAGGTGTTGAAAAGAGGACCTC
Monodelphis domestica TGCCAAGGCATTTTGCTGTATCTAGAAAAGAGTCAGGAGCCAGAAACCGAAGAGAAGATTCC
Macropus eugenii      TGCCAAGGCATTTTGCTATATCAAGAAAGAGTGGGGAGCCAGAAATGGAAAAGAAGATTCC
Wallabia bicolor      TGCCAAGGCATTTTGCTGTACCAAGAAAGAGTGGGGAGCCAGAAATGGAAAAGAAGATTCC
                        *  *  *  *  *  *  *  *  *  *  *  *  *  *  *  *  *  *  *
```

```
Gallus gallus          AATTCTGCCGGAAGATGCTCCATTAGATGTTACAGAAGAACCTTTCCAACATCAGAGAG
Monodelphis domestica TTTAGTTCTTGAGAAAACCAGATCTGAGATCTCCAAGGAGCAATTTGGTTCAACAGATAG
Macropus eugenii      TCTAGTTCCTGAGGAAGCAGGATCTGAGATCTCCAAGGGGCAAGTTGGTTCTGCAGAGAT
Wallabia bicolor      TCTAGTTCCTGAGGAAGCAGGATCTGAGATCTCCAAGGGGCAAGTTGGTTCCGCAGAGAT
                        *  *  *  *  *  *  *  *  *  *  *  *  *  *  *  *  *  *  *
```

```
Gallus gallus          AGCTTCCAGGG
Monodelphis domestica GACTTTGAAGG
Macropus eugenii      GATTTTTAAGG
Wallabia bicolor      GATTTTTAAGG
                        *  *  *  *
```

Pairwise SIM alignments to chicken sequence

```
Gallus gallus          CCTAAGTTTCTGGGTGACATCAAACCCAGTGTTAGCTGCTTTTCTCCATGGCATTAGT
Monodelphis domestica ATGAAGTTCTTGAGGACAACATCCATCCATGCTAACTGCAATATTTCAAGGTAGAATGC
Macropus eugenii      ATGATGTTCTCGGAAAGCAATCATCCACCCATAATGACTGGAATATTTAAGGTAGAATAC
Wallabia bicolor      NNNNNGTTCTCGGAGAGCAATCATCCACCCATAATGACTGGAATATTTAAGGTAGAATAC
                        *  *  *  *  *  *  *  *  *  *  *  *  *  *  *  *
```





Pairwise SIM alignments to chicken sequence

|                              |                                                                |
|------------------------------|----------------------------------------------------------------|
| <i>Gallus gallus</i>         | ATTCAAGTTCCTTTATGGATGGCAGGGAAAACATGTGGAATCTGTGGAAAATATGATGCA   |
| <i>Monodelphis domestica</i> | GTTCACATTTCTTTCTGGATGATTGGAAAAACACATCATCTGCATAGACAAGCAAATGCA   |
| <i>Macropus eugenii</i>      | GTTTCATATTTCTTTCTGGATGATTGGAAAAACACTTGGCCTCTGTGGACAAGCAAATGCA  |
| <i>Wallabia bicolor</i>      | NNNNNNNNNNNNNNNNNNNNNNNNNNNNNNNNNNNNNNNNNNNNNNNNNNNNNNNNNNNNNN |

|                              |                                                                |
|------------------------------|----------------------------------------------------------------|
| <i>Gallus gallus</i>         | GAATGCGAACAGGAGTATCGGATGCCCAATGGATATCTAGCTAAAAATGCCGTGAGCTTT   |
| <i>Monodelphis domestica</i> | GAAACCACCCAGGAGTTTCAGATGCCCGGTGGCTACATGGCTAAAGATGCTATGAGTGCT   |
| <i>Macropus eugenii</i>      | GAAACCATTCAAGAATTCCAGATGCCCAGTGGCTACATAGCTAAAGATGCTGTGAGCTTT   |
| <i>Wallabia bicolor</i>      | NNNNNNNNNNNNNNNNNNNNNNNNNNNNNNNNNNNNNNNNNNNNNNNNNNNNNNNNNNNNNN |

|                              |                                                                |
|------------------------------|----------------------------------------------------------------|
| <i>Gallus gallus</i>         | GGTCATTCTTGGATCTTGAAGAAGCGCCCTGTAGAGGAG                        |
| <i>Monodelphis domestica</i> | GCTCAATCTTGGGTCTGACAGATGGCTCTTGCTCCAGGG                        |
| <i>Macropus eugenii</i>      | GCTTGATCTTGGGTCTGACAGATGACTCCTGCTCCAGAG                        |
| <i>Wallabia bicolor</i>      | NNNNNNNNNNNNNNNNNNNNNNNNNNNNNNNNNNNNNNNNNNNNNNNNNNNNNNNNNNNNNN |

Pairwise SIM alignments to chicken sequence

|                              |                                                                |
|------------------------------|----------------------------------------------------------------|
| <i>Gallus gallus</i>         | CTTGTAAGTGCATCGTTCATTCGTGAAGCTTGAGAAGACGGTTCAGCTGGCGGGTGTG     |
| <i>Monodelphis domestica</i> | CATGTTCTTTTCAACACCAGTTCATGAAACTTGAGGAAATAATTTTCCTTCAAGGAGAAC   |
| <i>Macropus eugenii</i>      | CTTGTTCTTTTCAACACCAGTTCATGAGACTTGAGAAACAATTTACCTTCAAGGAGAAA    |
| <i>Wallabia bicolor</i>      | NNNNNNNNNNNNNNNNNNNNNNNNNNNNNNNNNNNNNNNNNNNNNNNNNNNNNNNNNNNNNN |

|                              |                                                                |
|------------------------------|----------------------------------------------------------------|
| <i>Gallus gallus</i>         | ATTCCAAGTGCTACTCTACAGAGCCTGTGCTGCGCTGTGCAAAGG---GATGCTCTGCT    |
| <i>Monodelphis domestica</i> | ATTCTTCTTGCTTTTTCAGCACAGCCAGTGTGGGGTGTCTGAAGGACTAGAAAATGGGGT   |
| <i>Macropus eugenii</i>      | ATTCTTCATGCTCATCCGTGCAGCCAGTGTGAGGTGTTGGAAGGGCTGCAGAGTGGGCC    |
| <i>Wallabia bicolor</i>      | NNNNNNNNNNNNNNNNNNNNNNNNNNNNNNNNNNNNNNNNNNNNNNNNNNNNNNNNNNNNNN |

|                              |                                                                |
|------------------------------|----------------------------------------------------------------|
| <i>Gallus gallus</i>         | ACCAAGACAACTCCAGT-AACTGTTGGCTTCCACTGCCTCCAGCTG                 |
| <i>Monodelphis domestica</i> | AAACCATCAGCACCCCTT-A----TTGGCTTTTATTAAGTCCCAATTG               |
| <i>Macropus eugenii</i>      | AAACCATCAGCACCCCTTGG---TTGACTTTCATTGCCTTCCAGCTG                |
| <i>Wallabia bicolor</i>      | NNNNNNNNNNNNNNNNNNNNNNNNNNNNNNNNNNNNNNNNNNNNNNNNNNNNNNNNNNNNNN |

Pairwise SIM alignments to chicken sequence

|                              |                                                                |
|------------------------------|----------------------------------------------------------------|
| <i>Gallus gallus</i>         | ATTCAGCTAACAGCCTGACTGACAAACAGATGAAGTACGACCAGAAGTCAGAAGACATGC   |
| <i>Monodelphis domestica</i> | ATTCTGATGCCCACTCTGCCACTGCCCTGACAAGGTTAGACCTGAAGTCCCAAGATATGG   |
| <i>Macropus eugenii</i>      | ATTCTGATGCCCACTTTGCCATGGCACCATCAAGATTGGAGCTAAAGTCTGAGGATGTGG   |
| <i>Wallabia bicolor</i>      | NNNNNNNNNNNNNNNNNNNNNNNNNNNNNNNNNNNNNNNNNNNNNNNNNNNNNNNNNNNNNN |

|                              |      |
|------------------------------|------|
| <i>Gallus gallus</i>         | AGGA |
| <i>Monodelphis domestica</i> | AGGA |
| <i>Macropus eugenii</i>      | AGGA |
| <i>Wallabia bicolor</i>      | NNNN |

**c. *VIT3***

Pairwise SIM alignments to chicken sequence

[illegible]

|                       |                                                |
|-----------------------|------------------------------------------------|
| Gallus gallus         | CCTCATCCTGCATGGGCTGCCAGGCAAGGGGTTCAGCACACCGG   |
| Monodelphis domestica | GATGATTTCAGTGAGCGCCAGAAAAAAGTTTGGCTCATTGGG     |
| Macropus eugenii      | NNNNNNNNNNNNNNNNNNNNNNNNNNNNNNNNNNNNNNNNNNNNNN |
| Wallabia bicolor      | NNNNNNNNNNNNNNNNNNNNNNNNNNNNNNNNNNNNNNNNNNNNNN |

Pairwise SIM alignments to chicken sequence

*Gallus gallus* CCACTGTCATGACCTTGCTGCTGAAGCTTCAAGCAGA---AGCCATGTTGAAGACATGGC  
*Monodelphis domestica* TTATTTCTTGACTTTTGTTACCATGGCTTTTAGCAGATAGAGGTCTAAGGAAGAAATGAC  
*Macropus eugenii* CTGT-----CTTTCTTACTATGGCTTTTAGCAGATATAGGTCat-----atGAC  
*Wallabia bicolor* CTGT-----CTTTCTTACTATGGCTTTTAGCAGATATAGGTCat-----atGAC

\* \* \* \* \*

*Gallus gallus* CTTGGCCCTGAAAGCTATAGGCAATGCAGGAGAGCCAGCCAGCATCAAACGCATCCTGAA  
*Monodelphis domestica* TACAGCCCTGAAGGATATTGGGAATGTGGGCCAGTTAGAAAGTCATAAACACATTTCATAA  
*Macropus eugenii* CACAACCCCTGAAGGTTATtGCTAATGTAGKCCAgYYSGAAAGCYTTAAACAATCCAGAA  
*Wallabia bicolor* CACAACCCCTGAAGGTTATTGCTAACGTAGGCCAGTCAGAAAGCTTTAAACCAATTTCAGAA  
 \*\*\*\*\* \* \* \* \* \* \* \* \* \* \* \* \* \* \* \* \* \* \* \* \* \*

*Gallus gallus* GTTTTTGCCAACATTTTCACCTTGCTGCCGCGGCATTACCAAGCAGAATTCATACT-GATG  
*Monodelphis domestica* GTTCCTGACAGTATTTTAAATTGCTGCTTCTGATCTTCCAGTTTTAATTACAGGCAAGAAA  
*Macropus eugenii* GTTCCTGCCAATATTTTAAATTGCTGCTTCTGATCTTCCAGTTATAATTACAGGCA-GAAA  
*Wallabia bicolor* GTTCCTGCCAATATTTTAAATTGCTGCTTCTGATCTTCCAGTTATAATTACAGGCA-GAAA  
 \*\*\* \*\* \*\* \* \* \* \* \* \* \* \* \* \* \* \* \* \* \* \* \* \* \* \* \* \* \* \*

|                              |                                                 |
|------------------------------|-------------------------------------------------|
| <i>Gallus gallus</i>         | CCGTGCTGTCCTTGAG---GAAAAATAGCCAGAAAAGACCTGCAAAA |
| <i>Monodelphis domestica</i> | CTATTATGGCTCCAAGTTGGAAAAAGAAGTTGCAATATCTCTCAAAA |
| <i>Macropus eugenii</i>      | CTATTATACCTCTAAGATGGGAAACAGG-----CCCTCAAAA      |
| <i>Wallabia bicolor</i>      | CTATTATACCTCTAAGTTGGGAAACAGG-----CCCTCAAAA      |
|                              | * * * * *                                       |
|                              | * * * * *                                       |
|                              | * * * * *                                       |

Pairwise SIM alignments to chicken sequence

[illegible][illegible]





|                              |                                                                        |
|------------------------------|------------------------------------------------------------------------|
| <i>Gallus gallus</i>         | GTTCTACACATATCTTCCAGGAGCTGCGTATATGCTTGGCTACTCCCAGAAGCAGCAGCG           |
| <i>Monodelphis domestica</i> | GTTTTATGGATATGCTTCAAGAGTTGCATATATGTGAAGATTCTCTGAAAAGAAATGGAA           |
| <i>Macropus eugenii</i>      | GTTTTATGGATATGCTCCAAGAGTTGCATATATGTGAAGCTTCTCTGAAAAGAAATGGAA           |
| <i>Wallabia bicolor</i>      | GTTTTATGGATATGCTCCAAGAGTTGCATATATGTGAAGCTTCTCTGAAAAGAAATGGAA           |
|                              | *** ** * ** ** * ** ** * ** ** * ** ** * ** * ** * ** * ** * ** * ** * |

Pairwise SIM alignments to chicken sequence

[illegible]

|                              |              |
|------------------------------|--------------|
| <i>Gallus gallus</i>         | ACTTGCCAGCCA |
| <i>Monodelphis domestica</i> | ACTTGGCTCTCA |
| <i>Macropus eugenii</i>      | ACTTAGTTGTCA |
| <i>Wallabia bicolor</i>      | ACTTAGTTGTCA |
|                              | **** **      |

|                              |                                                               |
|------------------------------|---------------------------------------------------------------|
| <i>Gallus gallus</i>         | TGAGGTTGACATGTATGTTTCCAATGGACTAATCC---AGCTGAAGATTAAATGGTGTTCA |
| <i>Monodelphis domestica</i> | TGACATTGACATGTATACT---AAAGGAAAATGCCCTAAACTGAAGATTAAATGG-GTTAG |
| <i>Macropus eugenii</i>      | TGACATTGTCATGTATCCT---AAAGGAGAATGCCTTAGAGTGAAGATTAAATGA-GTTAG |
| <i>Wallabia bicolor</i>      | TGACATTGTCATGTATCCT---AAAGGAGAATGCCTTAGAGTGAAGATTAAATGA-GTTAG |
|                              | *** ** * ***** *                                              |
|                              | ** *** * **                                                   |
|                              | ***** **                                                      |

|                              |                                         |
|------------------------------|-----------------------------------------|
| <i>Gallus gallus</i>         | AACCCCAAC----AGACGTTCCATACACATCTAAGTCTG |
| <i>Monodelphis domestica</i> | AAACTTAGCTGTAAAACTCTCATGTCAGTCTACTTTAG  |
| <i>Macropus eugenii</i>      | AAACTCAGCTGGA AAAACT-----ATCAGTGTGGTTTG |
| <i>Wallabia bicolor</i>      | AAACTCAGCTGGA AAAACTCCTAT--CAGTGTGGTTTG |
|                              | * * * * *                               |

Pairwise SIM alignments to chicken sequence

|                              |                                                              |
|------------------------------|--------------------------------------------------------------|
| <i>Gallus gallus</i>         | TGCTGATAAGCAGTGAGAAGGAAGGTTTGTCATTAAAAGCCCCTGAATATGGTGTAGAAA |
| <i>Monodelphis domestica</i> | TGTTGATTGAGAATGAGAAA-ACATTCTCTTGCTAATAGCACCAGACTATGGAATTAATA |
| <i>Macropus eugenii</i>      | NNNNNNNNNNNNNNNNNNNNNNNNNNNNNNNNNNNNNNNNNNNNNNNNNNNNNNNNNNNN |
| <i>Wallabia bicolor</i>      | NNNNNNNNNNNNNNNNNNNNNNNNNNNNNNNNNNNNNNNNNNNNNNNNNNNNNNNNNNNN |

|                              |                                                              |
|------------------------------|--------------------------------------------------------------|
| <i>Gallus gallus</i>         | AACTATATTACGATAGACGTAACTT-----GAG                            |
| <i>Monodelphis domestica</i> | AACTTGTTTTTTAATCATGAAACCACCTACCGTACAAG                       |
| <i>Macropus eugenii</i>      | NNNNNNNNNNNNNNNNNNNNNNNNNNNNNNNNNNNNNNNNNNNNNNNNNNNNNNNNNNNN |
| <i>Wallabia bicolor</i>      | NNNNNNNNNNNNNNNNNNNNNNNNNNNNNNNNNNNNNNNNNNNNNNNNNNNNNNNNNNNN |

Pairwise SIM alignments to chicken sequence

|                              |                                                              |
|------------------------------|--------------------------------------------------------------|
| <i>Gallus gallus</i>         | AT-----TCGGGTTGCTTTCTGGATGGTTGGAAAAACATGTGGTATTTGTGGAAAT     |
| <i>Monodelphis domestica</i> | ATCACACAGCTCTAACTTTCCTCTAGAAAGTGAGAAAAACAAACGGTTTGTGTGGCAATT |
| <i>Macropus eugenii</i>      | NNNNNNNNNNNNNNNNNNNNNNNNNNNNNNNNNNNNNNNNNNNNNNNNNNNNNNNNNNNN |
| <i>Wallabia bicolor</i>      | NNNNNNNNNNNNNNNNNNNNNNNNNNNNNNNNNNNNNNNNNNNNNNNNNNNNNNNNNNNN |

|                              |                                                              |
|------------------------------|--------------------------------------------------------------|
| <i>Gallus gallus</i>         | ATGATGCTGAGAAGAAAAGGGAGTATCAA-ATGCCCAGTGGATATTTAGCTAAAGATGCA |
| <i>Monodelphis domestica</i> | CGGATTC--ACAAAGTAAACGAGAATCAAGATTCCCAATGGGGATC-AGCTAAAGATGCA |
| <i>Macropus eugenii</i>      | NNNNNNNNNNNNNNNNNNNNNNNNNNNNNNNNNNNNNNNNNNNNNNNNNNNNNNNNNNNN |
| <i>Wallabia bicolor</i>      | NNNNNNNNNNNNNNNNNNNNNNNNNNNNNNNNNNNNNNNNNNNNNNNNNNNNNNNNNNNN |

|                              |                                                              |
|------------------------------|--------------------------------------------------------------|
| <i>Gallus gallus</i>         | GTGAGTTTTGCTCAGTCCTGGGTCATCTCAGAAGACACGTGT                   |
| <i>Monodelphis domestica</i> | TTAAGCATTGCTTGCACTTAGATCTTGCGAGATGATACCTGT                   |
| <i>Macropus eugenii</i>      | NNNNNNNNNNNNNNNNNNNNNNNNNNNNNNNNNNNNNNNNNNNNNNNNNNNNNNNNNNNN |
| <i>Wallabia bicolor</i>      | NNNNNNNNNNNNNNNNNNNNNNNNNNNNNNNNNNNNNNNNNNNNNNNNNNNNNNNNNNNN |

Pairwise SIM alignments to chicken sequence

|                              |                                                                                      |
|------------------------------|--------------------------------------------------------------------------------------|
| <i>Gallus gallus</i>         | CTTGCAAGCTGCAGAGGAAATTGTCAAATGAGAAGCCGGTTGCATTT---AACAAAA                            |
| <i>Monodelphis domestica</i> | TATGTGGACTGTTCTGAAAAGTCATAAAGATTGAGAAAATGAT-----GAAAAGA                              |
| <i>Macropus eugenii</i>      | AATGTCGACT-tTCTGAAAACTCATAAAAATTGAAAAAATTATTATTGGTTATGAAAAGA                         |
| <i>Wallabia bicolor</i>      | AATGTCGACT-tTCTGAAAACTCATAAAAATTGAGAAAATTATTATTGGTTATGAAAAGA                         |
|                              | **      **          *  ***  *  *  **  *****  **          *                  *  **  * |

|                              |                                                                              |
|------------------------------|------------------------------------------------------------------------------|
| <i>Gallus gallus</i>         | AGGCCTCAAAATGCTTTTCCATTGAGCCAGTTTAC---GCTGTGCAGAAGGCTGTTC                    |
| <i>Monodelphis domestica</i> | AAGCTGTGACGTGCTTGTCAATTGAGCTGGTTTGAGCTCAGCAGCGGAGGTGGTTGTCCA                 |
| <i>Macropus eugenii</i>      | AAGCTGCAACTTGCTTGTGAYTCAGCTGATTTTGGCACAGTGGTGGGGGGAGTTGGCTA                  |
| <i>Wallabia bicolor</i>      | AAGCTGCAACTTGCTTGTGATTGAGCTGATTTTGGCACAGTGGTGGGGGGAGTTGGCTA                  |
|                              | *  **          *  *****  *  *  *  ***      ***          *  *  *  *  *  **  * |

|                              |                                                            |
|------------------------------|------------------------------------------------------------|
| <i>Gallus gallus</i>         | GCAACCAGGACTGTTTCCTGTCTCTGTGGGTTTCCACTGTGTCCCATCTG         |
| <i>Monodelphis domestica</i> | TGAA----AACTGCCCTGGTCTCTGTGGGCTTTTCATTGTCTAGTAGCTT         |
| <i>Macropus eugenii</i>      | TGAA----AACTGCYTGGGTCTCTGTGGGCTTCTGCTGTTTAGCAGCTG          |
| <i>Wallabia bicolor</i>      | TGAA----AACTGCCTGGGTCTCTGTGGGCTTCTCTGTTTAGCAGCTG           |
|                              | **          ****          *****  **          ***  *  *  ** |
