# Supplementary material
Source: PubMed Central journal article supplement (PMC2270319)
Supplement: pbio.0060063.sg005.pdf [file pbio.0060063.sg005.pdf]

## Figure S5

### a. *VIT1*

*Gallus gallus VIT1*  
*O. anatinus VIT1*

```
ATGAGGGTTTAATATCAGCCCTGGTTTTAACCTGGTGGGGAGTCAGCATCTTAATTAC
ATGAAAGGGTTCATTTTCTCCCTACTTTCTACTCTTTCAGGGAGTCAGCGTCTTAATTAT
****  ** ** ** *   ****  **  ** **  ***** *****
```

*Gallus gallus VIT1*  
*O. anatinus VIT1*

```
CAACCTGATTTTGGTGAAAATAAGGTTTATACATAACAATTATGAAAGCATACTTTTCAGT
GCACATGACTTTGTGGAAGGCAACATTTACACCTACAGTTGTGAAAATATGCTTCTTAAA
  ** *** ***** **  ** ***** ** ***** * ***** ** *** * *
```

*Gallus gallus VIT1*  
*O. anatinus VIT1*

```
GGTATTCCAGAGAAAGGACTTGCAAGAACTGGAATAAGGATAAGAAGTGAAGTGGAAATT
GGATTGCCAGAATGGGACTTGGAAGAGCTGGAATAAAACTGAATTGTAAAGTGGAAATC
**  * ***** ***** ** ***** * *  ** *****
```

*Gallus gallus VIT1*  
*O. anatinus VIT1*

```
AGTGGTATTGGACAAAACCTTTGTCTTATTAGGATTCACCTCAATTGAAGCAGCAGAGTAC
AGTGGCACTGGGCCAAAATTCAGTCTTATTAGG-----TTCAGTGGAAACCTTCGATTAG
***** * *** ***** * ***** ***** ***** * * * * ** **
```

*Gallus gallus VIT1*  
*O. anatinus VIT1*

```
AATGGCATCTGGCCTACAAGCTCATTCTCTCGGTCACTCAAACCTGACTCAGGCACTAACT
AA----ATCTGGCCAGGAGACTCATTATTCCATCACCTGAACCTATCCAGTCACTGGTG
**  ***** * ***** ** ***** ***** * ** *****
```

*Gallus gallus VIT1*  
*O. anatinus VIT1*

```
GGACAGCTTAGTATTTCCCATCAAGTTTGAGTATAGCAATGGCCACGTTGGAAACCTTATG
ACACAACCTC-TACAGCCTTTGAAATTTAGGTCAGCAGAGGTTGGATTGGAAGCAGATAT
*** ** * ** * * ** ** ***** ** ***** *
```

*Gallus gallus VIT1*  
*O. anatinus VIT1*

```
GCTCCTGATCTGTCTCAGATGATGGTCTGAACATCTACAGAGGGATTCTCAATATTCTG
GCTCCAGATTCAGTATCAAATGCTGCCCTTAATATCTATAGAGGGATCCTTAATGTACTT
***** ***** ** *** ** * ** ** ***** ***** ** *** * **
```

*Gallus gallus VIT1*  
*O. anatinus VIT1*

```
GAGCTCAGTCTGAAGAAGATGCAGCATTTCATACAGTATACAGGAGGCTGGGATTGGAGGT
GAAATTACCATCGAGAGGACAGAAACCACGTACAGTTTACAGGAGATGGGGATCGGAGGA
**  * * * ** ** *   * ***** ***** ***** *****
```

*Gallus gallus VIT1*  
*O. anatinus VIT1*

```
ATTTGTAACACAACGTATGCAATTCAAGAAAACAAGAAAGCAAACCTAGTTGATGTGACC
CTCTGTACACCAGATACATCATCCAGGAAGACAAGAAGGAAGAGCATCACCATCAGC
 * *** ***** * **  ** ** ** ***** * * *   * * * *
```

*Gallus gallus VIT1*  
*O. anatinus VIT1*

```
AAATCCAAGGACCTGAACAGTTGTGAAGAGAAAAGAAACAAGAATTCCCGGCAACTGCT
AAGACCAAGGACCTCAACAGTTGCCAAGACAAGAGAGACAAGACCACGAAAGGGACGGCC
** ***** ***** ***** ** ** ***** *  * ** **
```

*Gallus gallus VIT1*  
*O. anatinus VIT1*

```
ACCTATAATTACAAAATTAATACACTCATAATGAAGCTGTAATCACACAAGCTGAAGTC
TCGTACAGTACAAGATGAAATACGCGGAAGCGGCGCCTTGATCACCCAAGTTAAGGCT
 * ** * ***** ** ***** *  *  * ** * ***** ***** * * *
```

*Gallus gallus VIT1*  
*O. anatinus VIT1*

```
GAGGAAGTCCACCAGTTTACACCTTTCCATGAGATAACAGGAGGAAATGCTATCGTAGAA
CAGCAGGTGTATCAGACGGCTCCCTTCAACGAACTCAACGGCGT--TGCCGTCGCTGAA
** * ** * ** * ** ** ** ** ** ** * * ** * ** * ** * ** * **
```

*Gallus gallus VIT1* GCAAGGCAGAACTTGCATTGATTGAAGTGCAAAAGCAAG--TGGCAGAAGTTCCACCAA  
*O. anatinus VIT1* TCCAAGCAGAAGCTGGTGCTTAATGATGTTCAAAGCAATCCTAACACAGCTTTTTTATA  
 \* \* \* \* \* \* \* \* \* \* \* \* \* \* \* \* \* \* \* \* \* \* \* \* \* \* \* \* \* \*

*Gallus gallus VIT1* AAGAATTTAGAAACGTGGATCACTTCACTTACCAGTTTGGCAGTGAATTGCTTCAGCTTC  
*O. anatinus VIT1* CCGACTTCCAGAAATGAGGATCACTCCTTTACCATTTGGGAGTGAAGTGCCTCAAATTC  
 \* \* \* \* \* \* \* \* \* \* \* \* \* \* \* \* \* \* \* \* \* \* \* \* \* \* \* \* \* \*

*Gallus gallus VIT1* CTGTCCACTTATTCAAATAGAGGAAAGACTGCAAGACTTAGTAGAGACGACATATGAAC  
*O. anatinus VIT1* CTGTGCATCTCTCCAAAATAGCACACAGCTTCAATATTTGGTCATTACACCTGTAAAA  
 \* \* \* \* \* \* \* \* \* \* \* \* \* \* \* \* \* \* \* \* \* \* \* \* \* \* \* \* \* \*

*Gallus gallus VIT1* AGCTTCCCAGTGATGCACCAGCAAAGCCCTCAAGCTTATGCACCTCTTGC-GTGCTGCA  
*O. anatinus VIT1* GCACTCCTAGGGACAGCCCTGCTACCTTCCCTCAACTCATCCAAATGTTCCCGAAATGCA  
 \* \* \* \* \* \* \* \* \* \* \* \* \* \* \* \* \* \* \* \* \* \* \* \* \* \* \* \* \* \*

*Gallus gallus VIT1* AATGAGGAGAACTATGAGTCAGTGTGGAACAGTTCTCAAGTCGGCCAGCATAACAGCCGC  
*O. anatinus VIT1* AGTGATCACAACATAAAATCCATTTGGAAGTAGTATTTAGCCAGCTGGCTCATAGGTTT  
 \* \* \* \* \* \* \* \* \* \* \* \* \* \* \* \* \* \* \* \* \* \* \* \* \* \* \* \* \* \*

*Gallus gallus VIT1* TACCTTTTGGATTTACTT-CCTGCAGCAGCCAGTCACCGTTCACTGAGATTTCTGAGGCA  
*O. anatinus VIT1* TTGATATTGGATACAGTGATTTCCAGTTTCCAGTGTCCCATATAATCAAGTTTCAACAGCA  
 \* \* \* \* \* \* \* \* \* \* \* \* \* \* \* \* \* \* \* \* \* \* \* \* \* \* \* \* \* \*

*Gallus gallus VIT1* TAAAATGGAAAGGCAAGAGGCTCAGACAGTGCTTGTGGCTCTCCACTCAAGCTCACCAAC  
*O. anatinus VIT1* CTGGAGAGAAAAGGAGAGGCTCAGACTGTGCTCGCATACTACATTTCCAGCACAGCTAC  
 \* \* \* \* \* \* \* \* \* \* \* \* \* \* \* \* \* \* \* \* \* \* \* \* \* \* \* \* \* \*

*Gallus gallus VIT1* TCAGAAGTGATGGAAGAAGCTACATTCTTATGAGTGGACTGGCAGCTAAATATTTTGT  
*O. anatinus VIT1* CCATGTATCATAGCTAAGGGTGCGTCTCTTATGGTGGGAATTGCAGCTAAGTATTCCTC  
 \* \* \* \* \* \* \* \* \* \* \* \* \* \* \* \* \* \* \* \* \* \* \* \* \* \* \* \* \* \*

*Gallus gallus VIT1* ACTGAATAATGCAGGAAGCTTAATTCCAACAATGGCAGTGTCCAGCTGCGGACACATTT  
*O. anatinus VIT1* AATAAAAAGTGCAGGAGCAGCATTTCCATCGGGATCATTTCTTCAGTCAAGGCAAATTT  
 \* \* \* \* \* \* \* \* \* \* \* \* \* \* \* \* \* \* \* \* \* \* \* \* \* \* \* \* \* \*

*Gallus gallus VIT1* CCTTGAAGAGTTGCTGATCCCATAGAGGTGGGAATAGCAGCTGAAGACTTCAGGAGAT  
*O. anatinus VIT1* CCTTGAACACTGCTGATATGTGGGAGAGGGAATGCTCACTCAACGAGTTCTAGAAAT  
 \* \* \* \* \* \* \* \* \* \* \* \* \* \* \* \* \* \* \* \* \* \* \* \* \* \* \* \* \* \*

*Gallus gallus VIT1* GTTGTAGAGTTATTCTCTGACAAGGACTGGGAGACTAAGTATGACTTCAGGGAAT  
*O. anatinus VIT1* GATCATGCAAAGC-ATCCATTGGGAAGCGACTCTTTCAGTGTAGATAGGATCAAGGGTAT  
 \* \* \* \* \* \* \* \* \* \* \* \* \* \* \* \* \* \* \* \* \* \* \* \* \* \* \* \* \* \*

*Gallus gallus VIT1* CCTAAAAAGCTGTCCGACTGGAAGGCACTCCCCGTGACAAACCTTTTGCATCAGGTTA  
*O. anatinus VIT1* TTTAAAAATGCTTTCAGACTGGAAGCAATATCCACAGATAAACCTATCGTCTCGGCCTA  
 \* \* \* \* \* \* \* \* \* \* \* \* \* \* \* \* \* \* \* \* \* \* \* \* \* \* \* \* \* \*

*Gallus gallus VIT1* CTTGAAGATGTTTGGCCAGGAGTTGCTCTTTGGTAGACTCGATAAAGACACCCTCCAAAA  
*O. anatinus VIT1* TGTGAAGTTATTTGGACAAGGATTTCTTTGCCGCCCTTGAGAAACATTTTCATCCAAAA  
 \* \* \* \* \* \* \* \* \* \* \* \* \* \* \* \* \* \* \* \* \* \* \* \* \* \* \* \* \* \*

*Gallus gallus* VIT1  
*O. anatinus* VIT1  
TGTATTGCAGGTATGGTATGGACCTGATGAAAAAATCCCTTCAATAAGGAGATTAATCAG  
TGCAATTCAGACT-----GCTTGAGGAAAAGCTTCAAGCAGTCAAGAACATCATTCA  
\*\* \* \* \*\* \* \* \* \* \* \* \* \* \* \* \* \* \* \* \* \* \* \*

*Gallus gallus* VIT1  
*O. anatinus* VIT1  
TAGCCTTCAAACCTGGCATAGGAAGACAATGGACTAAGGCTTTACTATTGTCTGAGATTCTG  
TATTTTCAAACCTGGCTTCACAGTCCAGTGGCTAAACCACTGCCTTTTCTAAAGTCCA  
\*\* \* \* \* \* \* \* \* \* \* \* \* \* \* \* \* \* \* \* \* \* \* \* \* \* \* \* \*

*Gallus gallus* VIT1  
*O. anatinus* VIT1  
TTGTATTGTGCTACCTGTGTGGGTTCCCGATGGAGACCAGCTTCTATTACTCTTCTGT  
ACATATCATACCAACATTTACTGGTCTGCCCATAGAAAAGGTTTCTATTA-TACACTGT  
\*\*\* \* \* \* \* \* \* \* \* \* \* \* \* \* \* \* \* \* \* \* \* \* \* \* \* \* \* \*

*Gallus gallus* VIT1  
*O. anatinus* VIT1  
CACAAAAGTGGCAGGAAACGTTCAAGCGCAAATTACACCTTCACCGAGGTCTGATTTTCAG  
CACAAACATGGTCACCAAAGCTCATGCTCAGATTTACC--CACC---TCATCTTTTAG  
\*\*\*\*\* \*\* \* \* \* \* \* \* \* \* \* \* \* \* \* \* \* \* \* \* \* \* \*

*Gallus gallus* VIT1  
*O. anatinus* VIT1  
ATTGACTGAGTTAC--TAAATTCACGTTAGGCTGCGATCCAAAATGAGTCTAAGCATG  
ATGTGCTGACTTACATTTGATACCAGCAATAAATGCATTTAAAAACAACCTCTGAGCATG  
\*\* \* \* \* \* \* \* \* \* \* \* \* \* \* \* \* \* \* \* \* \* \* \* \* \* \* \* \*

*Gallus gallus* VIT1  
*O. anatinus* VIT1  
GCTAAACATATGACCTTTGTAATT---GGGATCAACACAAAACATGATCCAGGCAGGGCTG  
GCTAAAGAGATGA---TTGCAATTTTGGGAATTAATGACCATCGCCTTTAGGCTGGACTG  
\*\*\*\*\* \* \* \* \* \* \* \* \* \* \* \* \* \* \* \* \* \* \* \* \* \* \* \* \* \* \* \*

*Gallus gallus* VIT1  
*O. anatinus* VIT1  
GAAGCACACACTAAAGTAAATGCTCATGTACCTGTGAATGTTGTTGCCACTATTCAAATG  
GAAGTCTATTCGGGAGTTACGATGGATGTCCCTGCGAATTTACTTCTTC-ACTTGTTTT  
\*\*\*\*\* \* \* \* \* \* \* \* \* \* \* \* \* \* \* \* \* \* \* \* \* \* \* \* \* \* \* \*

*Gallus gallus* VIT1  
*O. anatinus* VIT1  
AAGGAAAAAGTATCAAAGCTGAAATTCACCATGCAAAGAAGAGACTAACTTAATTATT  
AAGGAAAAATAATTTACCTTTGAATTTCCCCAAGCAATCAGGAGACTGAGTTGCTTCT  
\*\*\*\*\* \* \* \* \* \* \* \* \* \* \* \* \* \* \* \* \* \* \* \* \* \* \* \* \* \* \* \*

*Gallus gallus* VIT1  
*O. anatinus* VIT1  
GTAAGCTCTAAGACATTTGCTGTTACACGAAATATTGAAGATTTGGCTGCTAGTAAGATG  
TTGAGGCTCTAAGCATATGCTGTTACTCAAATATTGAAGGTGCATCTAAAACAAAATG  
\* \* \* \* \* \* \* \* \* \* \* \* \* \* \* \* \* \* \* \* \* \* \* \* \* \* \* \* \*

*Gallus gallus* VIT1  
*O. anatinus* VIT1  
ACTCCAGTTCTTCTACCTGAAGCAGTGCCTGACATAATGAAGATGTCTTCGACTCAGAT  
ACTCTAATTATTGTACCAGAATTCAGACCTAGCATACTTAAAGGTCCCTTCAATTCAGGA  
\*\*\*\* \* \* \* \* \* \* \* \* \* \* \* \* \* \* \* \* \* \* \* \* \* \* \* \* \* \* \*

*Gallus gallus* VIT1  
*O. anatinus* VIT1  
TCTGCATCAGGCGAGACTGATAACGACAGACAGTCTGTAGAAGATGTTTCTCTGGAAT  
TTAGAATCAGGAGAGAATACTCAAGACCGACTGTCTTCCAAAATCAGATCAACAGGAAT  
\* \* \* \* \* \* \* \* \* \* \* \* \* \* \* \* \* \* \* \* \* \* \* \* \* \* \* \* \*

*Gallus gallus* VIT1  
*O. anatinus* VIT1  
TCCTTCTCCTTTGGACATCCTTCTTCCGGGAAGGAGCCATTTATTCAGTCCATGTGCTCC  
ATGGATTCAGTTGGAATGCCGTATCACTGAACAGCTCCATTTTTTCATTCCTATTGTTAT  
\*\* \* \* \* \* \* \* \* \* \* \* \* \* \* \* \* \* \* \* \* \* \* \* \* \* \* \* \*

*Gallus gallus* VIT1  
*O. anatinus* VIT1  
AACGCAAGTACATTTGGGGTTCAAGTGTGCATTGAGAAGAAAAGTGTACATGCAGCATTC  
AACACAAGTACCTTTGGATTCAATTTCTAT-----GAAACCTA-----CATT  
\*\* \* \* \* \* \* \* \* \* \* \* \* \* \* \* \* \* \* \* \* \* \* \* \* \* \* \* \*

*Gallus gallus* VIT1 ATCAGAAATGTGCCTCTTTATAACGCTATTGGAGAACATGCCCTTAGAATGAGCTTCAAG  
*O. anatinus* VIT1 ATTAGAGACATTCTCTATTACTACCTAACTGGGAAACACATCATAACCGTGACTATCAAG  
\*\* \*\*\* \* \* \* \*\* \*\* \* \*\*\* \*\* \* \* \* \*\* \* \* \* \*\* \* \* \* \*\*

*Gallus gallus* VIT1 CCAGTCTACTCAGATGTACCTATTGAAAAATACAAGTCACAATTCAGCAGGAGATCAA  
*O. anatinus* VIT1 CCAGTTCAATCAGATATGCCAATTGAAAAATGCATATAATAATTCAGACTGGTTCTCAG  
\*\*\*\*\* \* \*\*\*\*\* \* \*\* \*\*\*\*\* \*\* \* \* \*\*\*\*\* \* \*\* \*\*

*Gallus gallus* VIT1 GCTCTACAAAATGGTACGTTTAGTAACATTTTCCAGAAAAGAAGTGATGAAAA-----  
*O. anatinus* VIT1 GCACCTGGAGAGGAGACACGTTTAGTAAAGTTTCCAGAAAGAGCAGTACTGAAAACCACT  
\*\* \*\*\* \* \* \* \*\*\*\*\* \*\*\*\*\* \*\* \*\*\* \*\*\*\*\*

*Gallus gallus* VIT1 -----GAGTGAAGAAAATCCTTGATGACACTGATAACCAGCATTTCAGGACACAGGACAT  
*O. anatinus* VIT1 ACTCTAGGGCAAGAACAACCTAAAATGTCATTA AAAAGAAGGAAATGGAGAATAAAATGT  
\* \* \* \* \* \*\* \* \* \* \* \* \* \* \* \* \* \* \* \* \* \* \* \* \* \* \* \*

*Gallus gallus* VIT1 CAAGCAGCTCATCATCTTCTCTGAGTCTGGAAGCAGCCACAGCAA---CAGCAGCA  
*O. anatinus* VIT1 TAGTGGCTCAT-----CTTCTCCAAGTT---AAGCAGTGACAGCCAACACAGCAGCA  
\* \* \*\*\*\*\* \*\*\*\*\* \*\* \*\*\*\*\* \* \*\*\*\*\*

*Gallus gallus* VIT1 GCAGTGACAGCCGCAACTTCTGGGAGACGTAATTCACCTGGCATTACGATTGTGGCAC  
*O. anatinus* VIT1 GTAGGGAGAGCTACAATTCCTAGGAGAGATATGCCTCCAAGCTTAAGTGTATCGTCC  
\* \* \* \* \* \*\* \* \* \* \* \* \* \* \* \* \* \* \* \* \* \* \* \* \* \* \* \*

*Gallus gallus* VIT1 AGGCAGTAAGAAGTGACAACAGAAATCAAGGTTATCAAGCTACAGCATATGTTCTCGTTCCG  
*O. anatinus* VIT1 AGGCCATTAGGTTAGATAATAAAGATCAAAGTTATCAAGTCACAGCATATATCAGCTCTG  
\*\*\*\*\* \* \* \* \* \* \* \* \* \* \* \* \* \* \* \* \* \* \* \* \* \* \* \* \* \* \*

*Gallus gallus* VIT1 ATGCTGCCAAAGTTGATGTGCAACTAGTTGTGGTTCAGCTGGCTGAAACCAATTGGAAG  
*O. anatinus* VIT1 AGAGGGCTAAAGTTGACAGGCGATTAGTGGTGGTTCAGCTGTCTAATGGAAGCTGGCAAG  
\* \*\* \*\*\*\*\* \*\* \* \* \* \* \* \* \* \* \* \* \* \* \* \* \* \* \* \* \* \* \*

*Gallus gallus* VIT1 CATGTGCTGATGCTGTAATACTGCCTCTGAAAGCACAGGCTAGAATGAGATGGGGCAAGG  
*O. anatinus* VIT1 TATGTGGGATGCCATAGTGGCATCTCTCAAGGCAAAGGCCAGGCTCAGAAGGGTCCCAG  
\*\*\*\*\* \*\*\*\*\* \* \* \* \* \* \* \* \* \* \* \* \* \* \* \* \* \* \* \* \* \*

*Gallus gallus* VIT1 AGTGCCGAGACTACAGGATAGCAGCCTGGGCTACCACAGGCCAAATGGCAAGGAAGCTAG  
*O. anatinus* VIT1 AATTCCTGGACTACCCAAGTGGGCAATGGGTTCATGAGCCAGATTGCAGGAAATCCAG  
\* \* \* \* \* \*\*\*\*\* \* \* \* \* \* \* \* \* \* \* \* \* \* \* \* \* \* \* \* \* \*

*Gallus gallus* VIT1 CCGTGCAGCTGAAGTGCAATGGGGAATTATTCCTTCTGGATACTCATGCGGTATGTTC  
*O. anatinus* VIT1 CCATTCAGCTGAAGTGGGCTGGTCAAAAGTTCCAAGTCAAGTCAAAATGAAATCTGCTC  
\*\* \* \*\*\*\*\* \*\* \* \* \* \* \* \* \* \* \* \* \* \* \* \* \* \* \* \* \* \* \*

*Gallus gallus* VIT1 CTGGCGTGGCACTTGTGTTGGGCTTCTCAGAGGCGCATCAGAGAAACCCATCTCGTGAAC  
*O. anatinus* VIT1 CTTGGATTGCCTTGTTCAGGCTTTTCTGAAGCACAAAAGTAAAACCCCTCCACCGAA  
\*\* \* \* \* \* \* \* \* \* \* \* \* \* \* \* \* \* \* \* \* \* \* \* \* \* \* \* \*

*Gallus gallus* VIT1 TTATTGTACGGGCGAGTGGCAACATCTCCACGATCAATTGATACAGTAATTAAGTTC--C  
*O. anatinus* VIT1 AAGTTTTTAAGTCAGTGGTATCATCTCATGCATAATTGATAAAGCTGTTACAACACTGC  
\* \* \* \* \* \*\*\*\*\* \* \* \* \* \* \* \* \* \* \* \* \* \* \* \* \* \* \* \* \* \*

*Gallus gallus* *VIT1* TGGGACATGTGAAGTCAGTAAGGGAGATTTCAAACAT-TTGATCGCATGAGCTTTACCT  
*O. anatinus* *VIT1* AGGGGACTGTGAAGT-AGGAGAAAATATCTGGAAAACATTGACAGGGTTGAATACAATA  
\*\*\* \*\*\*\*\* \*\* \* \* \* \* \* \* \* \* \* \* \* \* \* \* \* \* \* \*

*Gallus gallus* *VIT1* GTTCTTTCAATAAAAAGCTGCAATGTGGTAGTGGCCCAAGATTGTACCGAACATCCAAAAT  
*O. anatinus* *VIT1* ATTCATATCCCAAAGCCTGTGATCTTCTTGTAGCCTAAGTCTGCCAAGCTGCACCAGCAT  
\*\*\* \* \* \* \* \* \* \* \* \* \* \* \* \* \* \* \* \* \* \* \* \* \* \* \* \* \* \* \*

*Gallus gallus* *VIT1* TCATCATTACTACAAGAAAAGTTGATCACCAGTCTTTGT-CAAGAGAGGTTACATAAAT  
*O. anatinus* *VIT1* TTGTTATTTTGACAAAAGATGT----CACAACTTCTACTGCAAGAGAAGTGTCTATCTTT  
\* \* \* \* \* \* \* \* \* \* \* \* \* \* \* \* \* \* \* \* \* \* \* \* \* \* \* \*

*Gallus gallus* *VIT1* ACAAGTTCAAATATTTAAAATTTATAAAAATGGAAAACAGTTATTGTGGAAGCTCCAATA  
*O. anatinus* *VIT1* CTGGGAAAACCCATTGAAATTTTCAAAGGAAGGAAATGTTACAGTGTGGTACCTGAA  
\* \* \* \* \* \* \* \* \* \* \* \* \* \* \* \* \* \* \* \* \* \* \* \* \* \* \* \*

*Gallus gallus* *VIT1* CATGGACTGAAGAATGTGAATTTTGTGGTGGAGATCCTTAAGGTTACTGTTGCTTCATGG  
*O. anatinus* *VIT1* TTTGGACTGGAAAACCTGAGTTAAGATGGAAAATATTAGAATCATTGTTACTTCATGG  
\*\*\*\*\* \* \* \* \* \* \* \* \* \* \* \* \* \* \* \* \* \* \* \* \* \* \* \* \* \* \* \* \*

*Gallus gallus* *VIT1* ATGAGAGGAAAGACCTGTGGAGTCTGTGGAAATAATGACAGAGAAAAGCACAATGAACCT  
*O. anatinus* *VIT1* ATGAAAGGGAAGACCTGTGGAAC-----ATGAATGGGGAGATTTAAGTGACCCG  
\*\*\* \* \* \* \* \* \* \* \* \* \* \* \* \* \* \* \* \* \* \* \* \* \* \* \* \* \* \* \*

*Gallus gallus* *VIT1* CTAAT-GCCAAATCATAAGCTGTGCAAACCTGCAGCGCAGTTATGTGAAGCTGAATCGAAA  
*O. anatinus* *VIT1* GAAATGGCAAATCACAAGCAGTGCAAACCTCAAAGCAAGTATGTGG-----TCTCGG  
\*\* \* \* \* \* \* \* \* \* \* \* \* \* \* \* \* \* \* \* \* \* \* \* \* \* \* \* \* \*

*Gallus gallus* *VIT1* TCCTACTATGA-TGGAGAGGAATCTACATGCTACTCCGTTGACCCAGTACTGAAATGTA  
*O. anatinus* *VIT1* GCCTTGTAGTGAACGGAGGAGAATCCAAATGCTACTCCTCAGCACAACATTGAAATGTA  
\*\*\* \*\* \* \* \* \* \* \* \* \* \* \* \* \* \* \* \* \* \* \* \* \* \* \* \* \* \* \* \* \*

*Gallus gallus* *VIT1* TGAAAGACTGTACTCCAACCTGCTGTAAGCCTGTTGGAATGGCAGAGAAGCA-GCGATAAG  
*O. anatinus* *VIT1* CAAATGGCTGTACAGCATCATCAGTAAATATGACTGACTG-CAAGGATGCACATGACAAG  
\* \* \* \* \* \* \* \* \* \* \* \* \* \* \* \* \* \* \* \* \* \* \* \* \* \* \* \*

*Gallus gallus* *VIT1* AAATCTGCATCTGAGGATGTTGTGGAGTCTGTGGATGCTGACATTGATTGTACCTGCACT  
*O. anatinus* *VIT1* CAATCTCTAGCAGACGGCAAAGTGAAGACAGTAGCTACTGATATTGATTGTACGTGTATG  
\*\*\*\*\* \* \* \* \* \* \* \* \* \* \* \* \* \* \* \* \* \* \* \* \* \* \* \* \* \* \* \* \*

*Gallus gallus* *VIT1* GGTGACTGTAGTTAA  
*O. anatinus* *VIT1* AGTGACTGTCTAGA  
\*\*\*\*\* \* \*

**b. VIT2**

*Gallus gallus* VIT2  
*O. anatinus* VIT

ATGAGGGGATCATACTGGCATTAGTGCTCACCCCTGTAGGCAGCCAGAAGTTTGACATT  
ATGAGGGCATTCATCTTGGCCCTGCTAGTCTCCCTGGCGNNNNNNNNNNNNNNNNNNNN  
\*\*\*\*\*    \*\*\*\*    \*\*\*\*    \*    \*    \*\*    \*\*\*\*    \*    \*

*Gallus gallus* VIT2  
*O. anatinus* VIT

GACCCAGGATTCAATAGCAGAAGGAGTTACCTGTACAACATGAAGTTCTATGTTGAAT  
NAGCCAGAATTTAGCAGCAGCAAGACCTACGTGTACAGTTACGAAGGACAGCTCCTCAGT  
\*    \*\*\*\*    \*\*\*    \*    \*\*\*\*\*    \*    \*\*    \*\*\*    \*\*\*\*\*    \*\*    \*\*\*\*\*    \*    \*    \*    \*

*Gallus gallus* VIT2  
*O. anatinus* VIT

GGGCTTCAAGACAGAAGTTTGGCAAAGCTGGTGTGCGCTTGAGCAGCAAGCTAGAGATC  
GGGTTGCCAGACAGAGATCTGGCGAGAGCTGGGTTGAAAATCTCGTGCAAAGTGGAGATT  
\*\*\*    \*    \*    \*\*\*\*\*    \*    \*\*\*    \*    \*\*\*\*\*    \*\*    \*    \*\*\*\*\*    \*    \*\*\*\*\*

*Gallus gallus* VIT2  
*O. anatinus* VIT

AGTGGGCTACCAGAGAATGCTTACCTCCTCAAGGTCCGCTCTCCACAAGTGGAGGAGTAC  
AGCGGAGCATCAGAGAAGGCACACTACCTCAAGNNNNNNNNNNCCCAAGTAGACGAATAC  
\*\*    \*\*    \*    \*\*\*\*\*    \*\*    \*\*    \*\*\*\*\*    \*\*\*\*\*    \*\*    \*\*    \*\*\*\*

*Gallus gallus* VIT2  
*O. anatinus* VIT

AATGGGTCTGGCCAGGGATCCCTTCACTCGATCTTCCAAAATCACCCAAGTGATCTCA  
AACGGCTACTGGCCNNAATGCCTTCGTTCACTCTTCCAAGCTCACCCGTATCCTCGCT  
\*\*    \*\*    \*\*\*\*\*    \*\*    \*\*\*\*\*    \*\*    \*\*\*\*\*    \*\*\*\*\*    \*    \*\*    \*

*Gallus gallus* VIT2  
*O. anatinus* VIT

TCGTGTTTCAACCGGCTCTTCAAATTTGAATACAGCAGTGGACGGATCGGAAACATTTAT  
TCCCACCTGAACGCGCCCATCAAATTCGAATATGTCAAAGGGAGGGTGGGAGCCATTTTT  
\*\*    \*    \*    \*    \*    \*    \*\*\*\*\*    \*\*\*\*\*    \*\*    \*\*    \*    \*\*\*\*\*    \*\*\*\*\*    \*

*Gallus gallus* VIT2  
*O. anatinus* VIT

GCCCCAGAAGACTGCCAGATCTGTGTGTTAACATAGTGAGAGGAATATTGAACATGTTC  
GCCCCGAGGACATGTCCGACACCGTTGTGAACATACTGAGAGGAATCCTCCAATGTTG  
\*\*\*\*\*    \*\*    \*\*\*    \*    \*\*    \*\*\*    \*\*\*\*\*    \*\*\*\*\*    \*    \*    \*\*\*\*\*

*Gallus gallus* VIT2  
*O. anatinus* VIT

CAGATGACCATTAATAAATCACAGAACGTCTACGAATTACAAGAGGCTGGAATTGGAGGT  
CACTTGACCATCAAGAAAACCCAGTCCGTTGTATGACCTGCAGGAGATGGGGATCGGAGGA  
\*\*    \*\*\*\*\*    \*\*    \*\*\*    \*    \*\*\*    \*\*    \*\*    \*    \*\*    \*\*\*    \*\*    \*\*    \*\*\*\*\*

*Gallus gallus* VIT2  
*O. anatinus* VIT

ATTTGTTCATGCAAGGTATGTTCATTCAGGAAGACAGGAAGAATAGCCGAATCTATGTTACC  
CTCTGTCACACCAGATACATCATCCAGGAAGACAAGAAGGAAGAGAGCATCACCATCAGC  
\*    \*\*\*\*\*    \*    \*\*    \*\*    \*\*\*\*    \*\*\*\*\*    \*\*\*\*\*    \*    \*    \*    \*\*    \*

*Gallus gallus* VIT2  
*O. anatinus* VIT

AGAACTGTGGACTTGAATAATTGCCAGGAAAAGGTGCAAAAAGCATTGGAATGGCTTAC  
AAGACCAAGGACCTCAACAGTTGCCAAGACAAGGTGGTGAAGAGCAGCGGGATGGCTTAC  
\*    \*\*    \*\*\*\*    \*    \*\*    \*    \*\*\*\*\*    \*\*    \*\*\*\*\*    \*\*    \*\*\*\*    \*\*    \*\*\*\*\*

*Gallus gallus* VIT2  
*O. anatinus* VIT

ATCTATCCCTGCCCTGTGGACGTGATGAAAGAAAGGCTCACCAAGGGACCACCGCTTTC  
AAGTTCACCTGCCCTTCTGCGACAAGAGAGACAAGACCACGAAAGGGACCGCCTCGTAC  
\*    \*    \*\*\*\*\*    \*    \*\*    \*    \*\*    \*\*\*    \*    \*    \*\*    \*\*\*\*\*    \*\*    \*    \*\*    \*

*Gallus gallus* VIT2  
*O. anatinus* VIT

TCCTACAAGCTGAAGCAGTCAGACAGCGGCACGCTGATCACAGATGTCTCGTCGGGCAG  
ACGTACAAGATGAAATACGCGGAAGCGGGCGCCTTGATCACCCAAGTTAAGGCTCAGCAG  
\*    \*\*\*\*\*    \*\*\*\*    \*    \*    \*\*    \*\*\*    \*    \*\*\*\*\*    \*    \*\*    \*    \*    \*\*\*\*\*

*Gallus gallus* VIIT2 GTGTATCAGATCTCCCCATTCAATGAGCCCACTGGGGTGGCTGTCATGGAAGCAAGACAG  
*O. anatinus* VIIT GTGTATCAGACGGCTCCCTTCAACGAACTCAACGGCGTTGCCGTCGCTGAATCCAAGCAA  
\*\*\*\*\* \* \*\* \*\*\*\*\* \*\* \* \*\* \* \*\* \* \*\* \* \*\* \* \*\* \* \*\* \* \*\* \*

*Gallus gallus* VIIT2 CAGCTCACTTTGGTCGAGGTGAGAAGTGAAGCGGGCAGTGCCCCAGATGTCCCATGCAG  
*O. anatinus* VIIT GTATTTACTCTGCTTGAAATTAAGCAAAA---CAGACCCCGCCGAAATACACCTGCGG  
\* \*\* \* \*\* \* \*\* \* \*\* \* \*\* \* \*\* \* \*\* \* \*\* \* \*\* \* \*\* \* \*\* \* \*\* \* \*\* \*

*Gallus gallus* VIIT2 AACTATGGCAGCCTTCGCTACCGCTTCCCAGCCGTACTGCCACAGATGCCACTTCAGCTG  
*O. anatinus* VIIT AATCACGGAAACATCCGGTACCATTTCCCTAAAGAGATGCAACAGATGCCGATGCAGATA  
\*\* \* \*\* \* \*\* \* \*\* \* \*\* \* \*\* \* \*\* \* \*\* \* \*\* \* \*\* \* \*\* \* \*\* \* \*\* \*

*Gallus gallus* VIIT2 ATCAAGACAAAAAACCTGAGCAACGGATAGTAGAAACGCTGCAGCACATAGTCTGAAT  
*O. anatinus* VIIT ATAAAGTTAAAAAATCCCGAAGACCGGATCTTGGAGACCCTGAAATATTTAGTACAGGCC  
\*\* \*\* \* \*\* \* \*\* \* \*\* \* \*\* \* \*\* \* \*\* \* \*\* \* \*\* \* \*\* \* \*\* \* \*\* \* \*\* \*

*Gallus gallus* VIIT2 AACCAACAAGATTTCCATGACGATGTTTCATACAGATTCTTAGAGGTGGTCCAGCTTTGC  
*O. anatinus* VIIT AATCAGCAGGATATCAAGGAAGACGCCCAACCAAATTCCTCGAGCTCACCTGCTTTGC  
\*\* \* \*\* \* \*\* \* \*\* \* \*\* \* \*\* \* \*\* \* \*\* \* \*\* \* \*\* \* \*\* \* \*\* \* \*\* \* \*\* \*

*Gallus gallus* VIIT2 CGGATAGCAAATGCTGACAATCTTGAGTCTATCTGGAGACAAGTTTCAGATAAACCTCGT  
*O. anatinus* VIIT CGGCATCGACTTTTGAAGGTCTGGACGCTGTCTGGAAGCAGTACGAGGGGAAGGCCAC  
\*\*\* \* \*\* \* \*\* \* \*\* \* \*\* \* \*\* \* \*\* \* \*\* \* \*\* \* \*\* \* \*\* \* \*\* \* \*\* \*

*Gallus gallus* VIIT2 TACAGGCGATGGCTCCTGAGCGCAGTTTCTGCGAGTGGCACCACAGAAACACTAAAATTC  
*O. anatinus* VIIT TACAGGCGATGGCTGCTGAGTGCCATTTCCATGGCCGGCTCTTTTGACTCGTTCAAGTTC  
\*\*\*\*\* \*\* \* \*\* \* \*\* \* \*\* \* \*\* \* \*\* \* \*\* \* \*\* \* \*\* \* \*\* \* \*\* \* \*\* \*

*Gallus gallus* VIIT2 CTTAAGAACAGAATTCGCAATGATGACCTCAACTACATTAGACCTTCTAACTGTTTCT  
*O. anatinus* VIIT CTGAAAAAAGATTCACGGGAGGAGACCCACTTCACGAAACAGCTGCCATCCTCTCG  
\*\* \* \*\* \* \*\* \* \*\* \* \*\* \* \*\* \* \*\* \* \*\* \* \*\* \* \*\* \* \*\* \* \*\* \* \*\* \*

*Gallus gallus* VIIT2 TTGACTCTTCATTTATTGCAAGCTGATGAACACACACTTCCAATAGCAGCAGATTTAATG  
*O. anatinus* VIIT CTGGTCTTCCATTCTATCAGACTCGAAGAGAACTGATACCTGAGGTCATCGATCTAGTG  
\*\* \* \*\* \* \*\* \* \*\* \* \*\* \* \*\* \* \*\* \* \*\* \* \*\* \* \*\* \* \*\* \* \*\* \* \*\* \*

*Gallus gallus* VIIT2 ACCAGCTCTCGAATTCAGAAAAATCCTGTGCTTCAGCAAGTGGCCTGCTTGGGATATAGC  
*O. anatinus* VIIT ACCAGCTCGCGATTAAAGAAAGACGCCACATTCCTCAAATTGCACTCCTGGGATACGGT  
\*\*\*\*\* \*\* \* \*\* \* \*\* \* \*\* \* \*\* \* \*\* \* \*\* \* \*\* \* \*\* \* \*\* \* \*\* \* \*\* \*

*Gallus gallus* VIIT2 TCTGTAGTCAACAGATACTGCTCTCAGACCTCAGCATGTCTAAGGAAGCTCTTCAGCCC  
*O. anatinus* VIIT TCCTTCGTGTACAGATACTGCGCCGCTTCCACCTGTCCGAATGCCGTTCTTCAGGTC  
\*\* \* \*\* \* \*\* \* \*\* \* \*\* \* \*\* \* \*\* \* \*\* \* \*\* \* \*\* \* \*\* \* \*\* \* \*\* \*

*Gallus gallus* VIIT2 ATCCATGACCTGGCAGATGAAGCAATCAGCAGGGGCCGTGAAGACAAAATGAAATTAGCT  
*O. anatinus* VIIT CTCACGACTTTGCGGCCGAGGCGCTTAGCAAAGGCCACGAGGAAGAGATGGCCATCGCC  
\*\*\*\*\* \*\* \* \*\* \* \*\* \* \*\* \* \*\* \* \*\* \* \*\* \* \*\* \* \*\* \* \*\* \* \*\* \* \*\* \*

*Gallus gallus* VIIT2 CTAAGTGCATTGGTAAACATGGGAGAACCAGCCAGCTTAAAGCGCATCCTGAAGTTCCTT  
*O. anatinus* VIIT CTGAAGGCCCTGGGCAACGCCGCCAGCCGGCCAGCATGAAGCGCATCCAGAAATTCCTG  
\*\* \*\* \* \*\* \* \*\* \* \*\* \* \*\* \* \*\* \* \*\* \* \*\* \* \*\* \* \*\* \* \*\* \* \*\* \* \*\* \*

*Gallus gallus* VIIT2  
*O. anatinus* VIIT

CCAATATCTTCATCCAGTGTCTGATATCCCAGTCCACATTCAGATAGATGCCATAACG  
CCGGGATTTTCATCCACTGCTTCTGATCTCCCCGTCAGGATTCAGGCGGAAGCCGTGATG  
\*\* \*\* \* \*\* \* \*\* \* \*\* \* \*\* \* \*\* \* \*\* \* \*\* \* \*\* \* \*\* \* \*\* \* \*\* \* \*\* \* \*\* \*

*Gallus gallus* VIIT2  
*O. anatinus* VIIT

GCCTTGAAAAAGATAGCTTGAAGGACCCCAAAACAGTGCAGGGCTATCTCATCCAGATC  
GCGTTCAGAAAAATGGCTTGAAGGACCCCAAAAAGTGCAGGATGTCCTTCTTCAGGTG  
\*\* \* \* \* \*\* \* \* \*\* \* \*\* \* \*\* \* \*\* \* \*\* \* \*\* \* \*\* \* \*\* \* \*\* \* \*\* \* \*\* \*

*Gallus gallus* VIIT2  
*O. anatinus* VIIT

CTTGACAGCAATCACTTCCCCCTGAGGTGCGAATGATGGCTTGTGCTGTTATCTTTGAG  
TACGTAGACCGCTCGATCCACCCCAACGTCGGATGGCGCCTGTGTGATCTGTTGCGAA  
\* \*\* \* \*\* \* \*\* \* \*\* \* \*\* \* \*\* \* \*\* \* \*\* \* \*\* \* \*\* \* \*\* \* \*\* \* \*\* \* \*\* \*

*Gallus gallus* VIIT2  
*O. anatinus* VIIT

ACAAGGCCTGCCCTTGCTTTGATAACGACTATAGCTAACGTGGCAATGAAGGAGAGCAAT  
ACCAAGCCGGCCTGACTCTGGTCATGATCATAGCCAGTTCGGTGCAAAAAGAGACCAGC  
\*\* \* \*\* \* \* \*\* \* \*\* \* \* \*\* \* \*\* \* \*\* \* \*\* \* \*\* \* \*\* \* \*\* \* \*\* \* \*\* \*

*Gallus gallus* VIIT2  
*O. anatinus* VIIT

ATGCAAGTGGCCAGTTTGTATATTCCACATGAAGTCTTTGTCAAAGAGCAGATTGCCA  
TTGCAAGTGGCCAGTTTCACTTATTTCGCACATGAAGGTGCTGTCCAAGAGCAGCATCCCG  
\*\*\*\*\* \*\* \* \*\* \* \*\* \* \*\* \* \*\* \* \*\* \* \*\* \* \*\* \* \*\* \* \*\* \* \*\* \*

*Gallus gallus* VIIT2  
*O. anatinus* VIIT

TTTATGTACAACATACTTCCGCTTGTAAACATGCCCCTTAAGCTCCTGTCCCCAAACTG  
GAGTTTGCCAACGTCACCACGCTGTGGAATCGCCATCAAATTCCTCAACCCCAAGCTG  
\* \*\* \* \*\* \* \* \*\* \* \*\* \* \*\* \* \*\* \* \*\* \* \*\* \* \*\* \* \*\* \* \*\* \* \*\* \* \*\* \*

*Gallus gallus* VIIT2  
*O. anatinus* VIIT

GACAGTATGAGCTATCGGTACAGCAAGGTCATTCGAGCAGACACTTACTTTGATAACTAT  
GACTATCTGAGCTACCGCTATAGCAAGGCTTTGCGCTTTGAAAAATACGTAGATCCATAT  
\*\*\* \* \*\* \* \*\* \* \*\* \* \*\* \* \*\* \* \*\* \* \*\* \* \*\* \* \*\* \* \*\* \* \*\* \* \*\* \* \*\* \*

*Gallus gallus* VIIT2  
*O. anatinus* VIIT

AGAGTTGGTGTACTGGAGAAATCTTTGTTGTGAACAGCCCAAGAACTATGTTCCCATCA  
CGAGCTGCTGCAATCGGAAGTGTCTACTTGATGAACAGTCCAAAGACTATGTTCCAGAA  
\*\*\* \*\* \* \*\* \* \* \*\* \* \* \*\* \* \*\* \* \*\* \* \*\* \* \*\* \* \*\* \* \*\* \* \*\* \* \*\* \*

*Gallus gallus* VIIT2  
*O. anatinus* VIIT

GCAATAATTTCCAAATTGATGGCAAATCTGTCAGGTTTCAGTGGCTGATCTGGTAGAGGTT  
ACTATAATTTCCAAATTGCAAGCCACTATGCATGTTTCGATAACTGATTTTTTCGAGTTT  
\* \*\* \* \*\* \* \*\* \* \*\* \* \*\* \* \*\* \* \*\* \* \*\* \* \*\* \* \*\* \* \*\* \* \*\* \* \*\* \* \*\* \*

*Gallus gallus* VIIT2  
*O. anatinus* VIIT

GGCATCCGAGTGAAGGCCTCGCAGATGTCATAATGAAAAGAAACATCCCATTTGCTGAA  
AGCATCCGGACTCAAGGCCTGACTGATGTTCTCTGGAACAAAACACCCCATTTGCTGAC  
\*\*\*\*\* \*\* \* \*\* \* \* \*\* \* \*\* \* \*\* \* \*\* \* \*\* \* \*\* \* \*\* \* \*\* \* \*\* \*

*Gallus gallus* VIIT2  
*O. anatinus* VIIT

TATCCACATACAAGCAGATAAAGGAGCTTGAAAAGCTCTGCAGGGATGGAAAGAGCTG  
TTTCCATGACCAAGAAGATCAAAGAAGCTTGTGAAAACTTTATTTGGATGGAAGGCATTA  
\* \* \*\* \* \*\* \* \*\* \* \*\* \* \*\* \* \*\* \* \*\* \* \*\* \* \*\* \* \*\* \* \*\* \* \*\* \* \*\* \*

*Gallus gallus* VIIT2  
*O. anatinus* VIIT

CCGACAGAAACCCCTTTGGTATCAGCCTACTTGAAAATACTTGCCAAGAAGTGGCCTTC  
CCTTCTGAGAAACCCCTGATCTCAGCTGACATCAAAGTATTTGGTCAAGAGCGGTTCTTT  
\*\* \* \*\* \* \* \*\* \* \*\* \* \*\* \* \*\* \* \*\* \* \*\* \* \*\* \* \*\* \* \*\* \* \*\* \* \*\* \*

*Gallus gallus* VIIT2  
*O. anatinus* VIIT

ATCAACATCAACAAGGAACCTCTGCAACAGGTCATGAAGACTGTAGTGAACCTGCTGAT  
CTCGATATCAACAAGGACCTTATTCAGAAGGCACTGAAGGTATTCTCGAACCAGGTAGAG  
\*\* \* \*\* \* \*\* \* \*\* \* \*\* \* \*\* \* \*\* \* \*\* \* \*\* \* \*\* \* \*\* \* \*\* \* \*\* \* \*\* \*











*Gallus gallus* VIIT2  
*O. anatinus* VIIT

CTGCGCTGTGCAAAGGGATGCTCTGCTACCAAGACAACCTCCAGTAACTGTTGGCTTCCAC  
TTGACGTGTCGAGAGGGATGCTCACCCACCAGAACTGCCCCCTTCGCCGTCGGTTTCCAC  
\*\* \*\*\* \* \*\*\*\*\* \* \*\*\*\*\* \*\* \* \*\* \* \* \*\* \* \*\* \*\*\*\*\*

*Gallus gallus* VIIT2  
*O. anatinus* VIIT

TGCCTCCCAGCTGATTCAGCTAACAGCCTAACTGACAAACAGATGAAGTACGACCAGAAG  
TGTCTGACAGCTGGATCCGCTTCTGCTCTCCCTGACGAGCACAGTAACTTGGACCAGAAA  
\*\* \* \*\* \*\*\*\*\* \*\* \*\*\* \*\* \*\*\*\*\* \* \*\* \* \*\* \* \*\*\*\*\*

*Gallus gallus* VIIT2  
*O. anatinus* VIIT

TCAGAAGACATGCAGGATACTGTTGATGCACACACAACGTGTTTCATGTGAGAATGAGGAA  
TCCGAAGATTTGGTAGAAACCGTCGATGCCACGCGACGTGCGCCTGTAGTAAACTACAG  
\*\* \*\*\*\*\* \*\* \*\* \* \*\* \*\*\*\*\* \*\* \* \*\*\*\*\* \* \*\* \* \*\* \*

*Gallus gallus* VIIT2  
*O. anatinus* VIIT

TGCAGTACATGA  
TGTGCCGCGTGA  
\*\* \* \*\*
