# Supplementary material
Source: PubMed Central journal article supplement (PMC2270319)

Figure S1

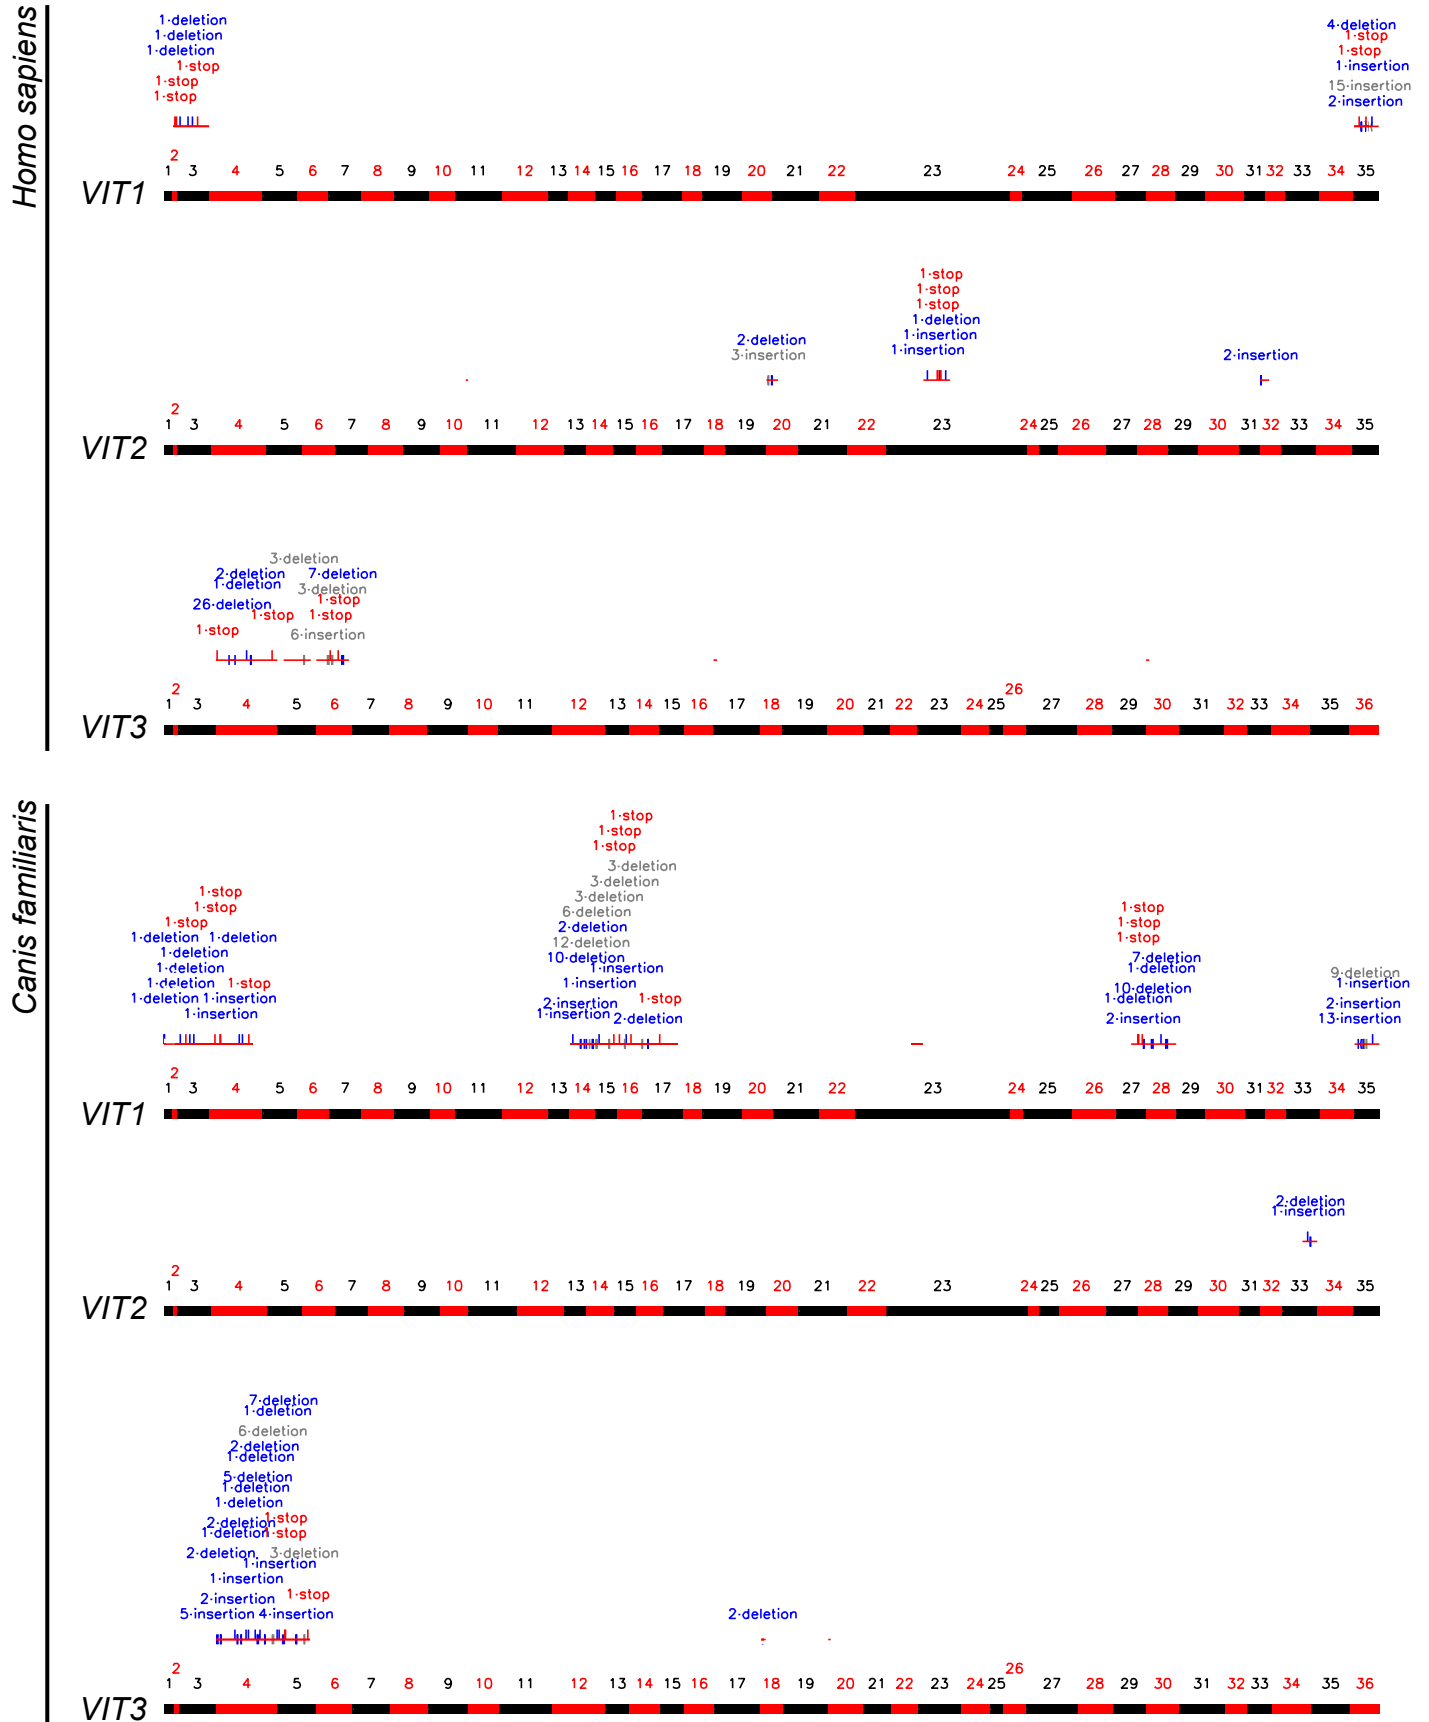

Supplement: pbio.0060063.sg001.pdf [file pbio.0060063.sg001.pdf]

Figure S4

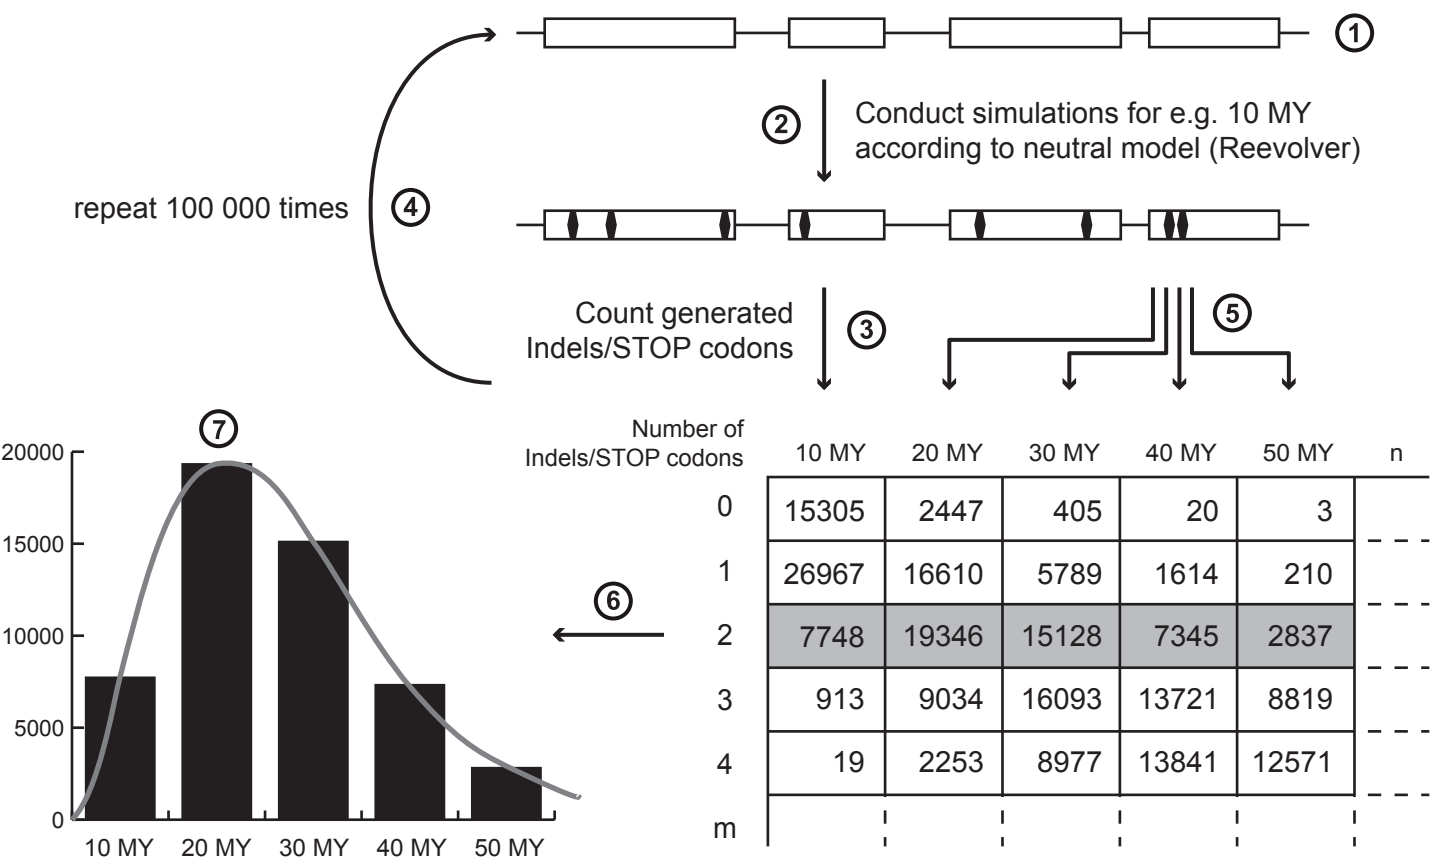

Supplement: pbio.0060063.sg004.pdf [file pbio.0060063.sg004.pdf]

Figure S6

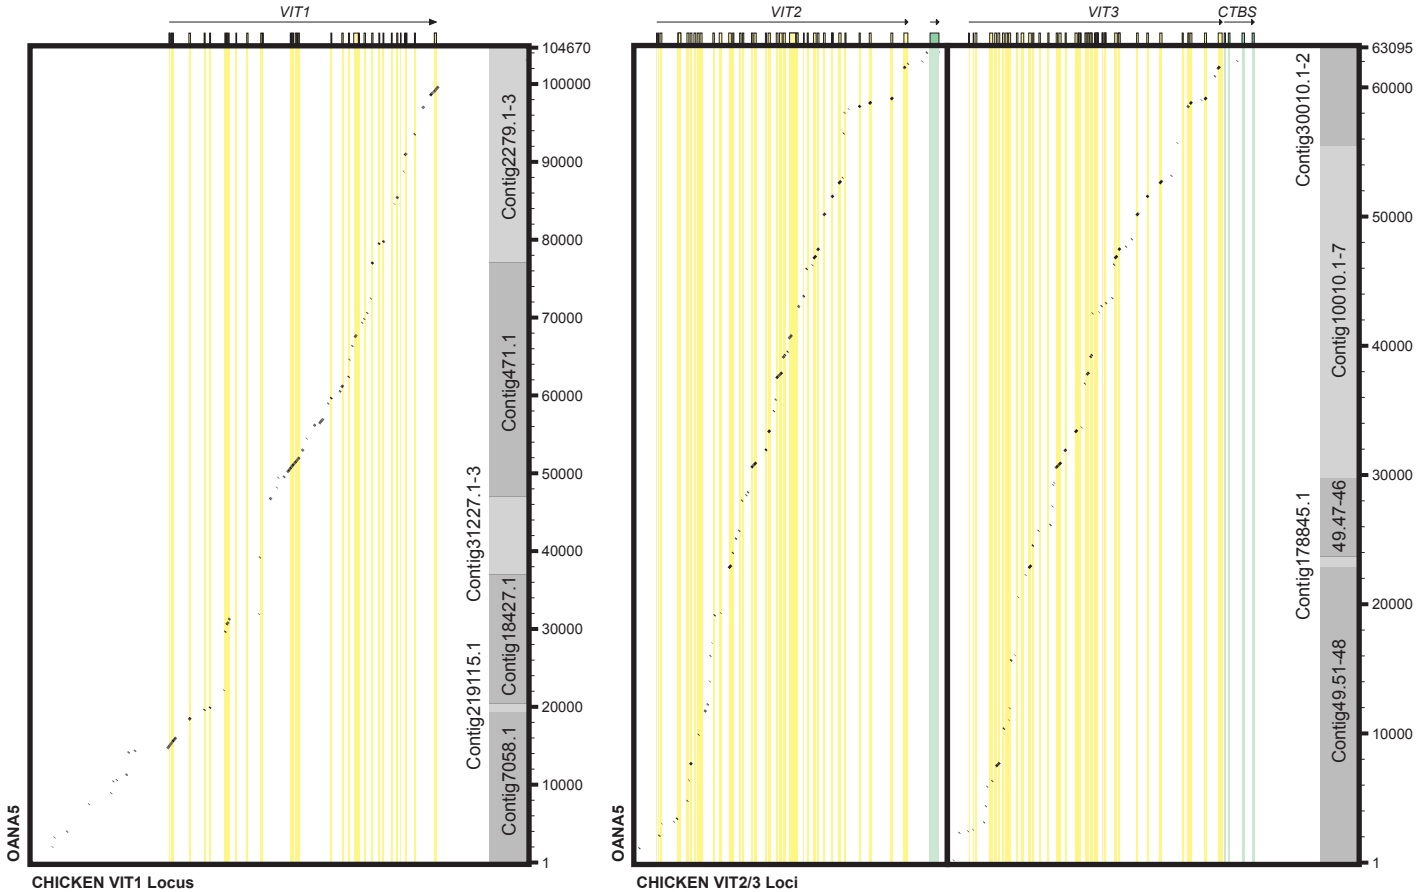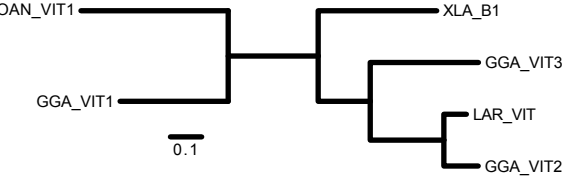

Supplement: pbio.0060063.sg006.pdf [file pbio.0060063.sg006.pdf]

Figure S7

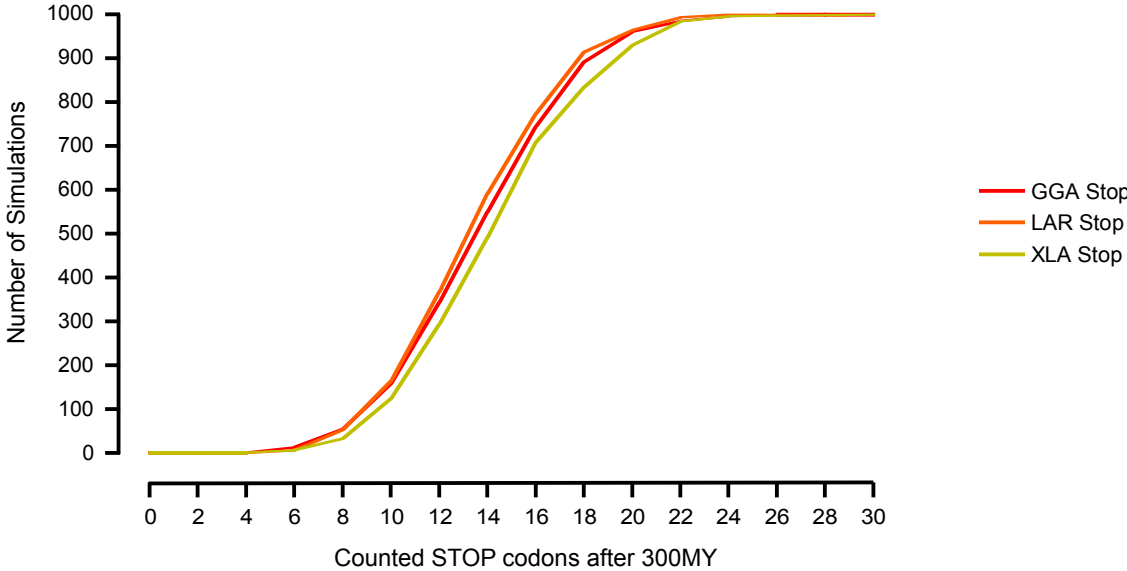

Supplement: pbio.0060063.sg007.pdf [file pbio.0060063.sg007.pdf]

Figure S8

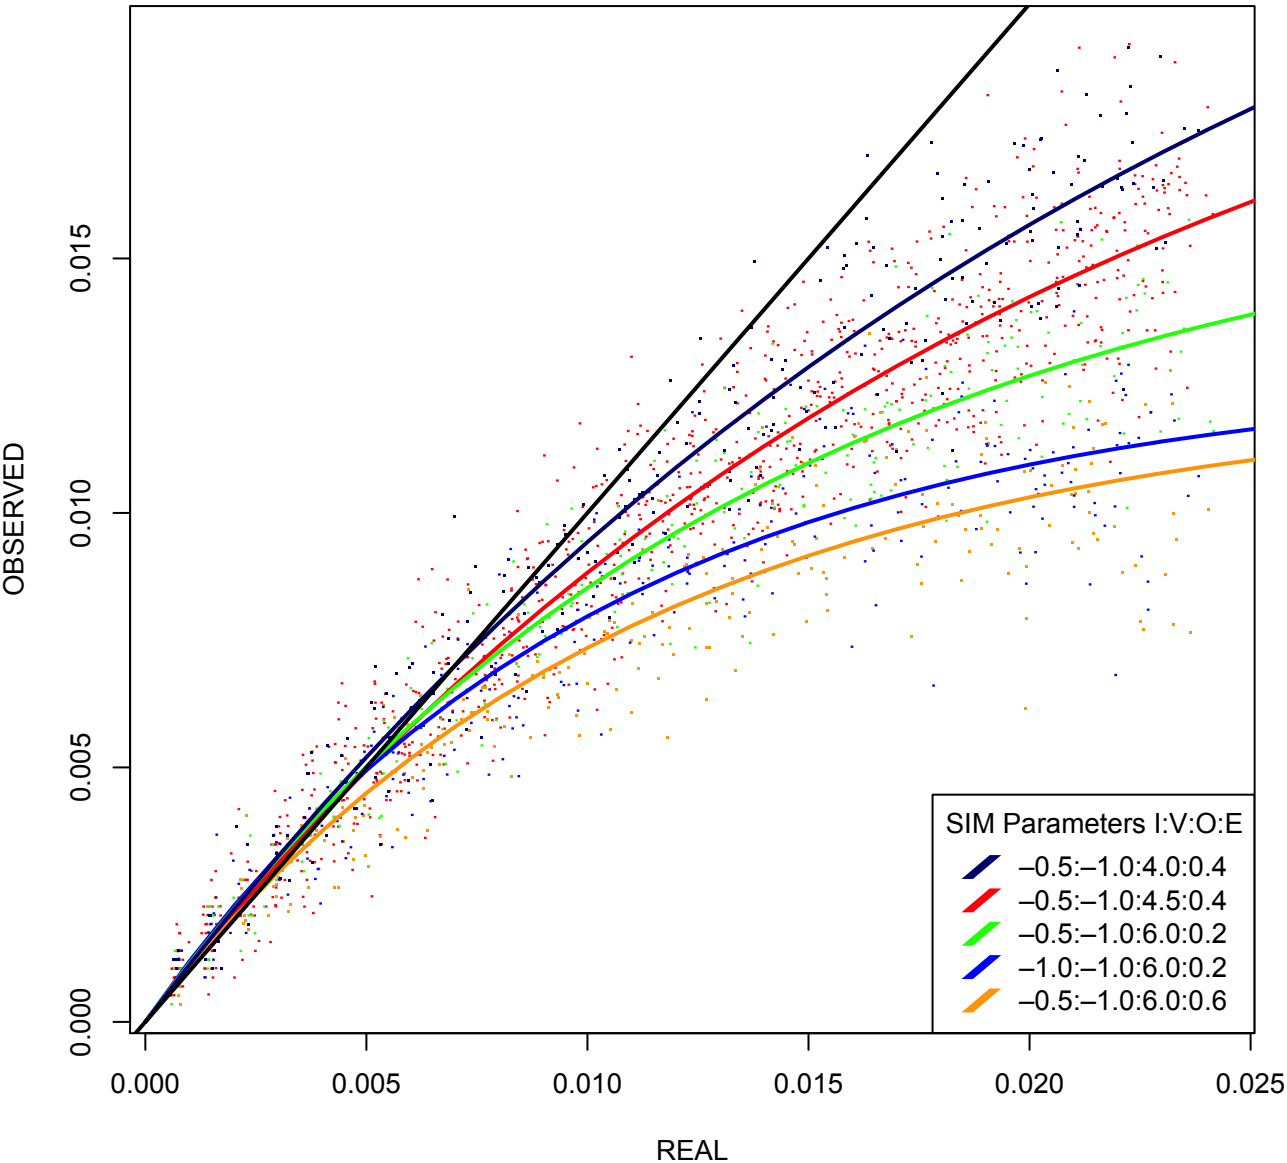

Supplement: pbio.0060063.sg008.pdf [file pbio.0060063.sg008.pdf]
